# Supplementary material for: Integrated Transcriptomic and Proteomic Analyses of Low-Nitrogen-Stress Tolerance and Function Analysis of ZmGST42 Gene in Maize
Source: MDPI journal article supplement (doi:10.3390/antiox12101831), 2023-10-05
Supplement: s1 [file s1]

## *Supplementary Material*

### Supplementary Tables 1, 4, and 5

**Supplementary Table 1.** Genes-specific primers used for qRT-PCR

| No. | Gene name      | Forward primer          | Reverse primer          | Product length | TM          |
|-----|----------------|-------------------------|-------------------------|----------------|-------------|
| 1   | Zm00001d014178 | CGATGTTACTCAAGTGGTACCT  | TCAACCGATAGTATCACTTCGG  | 168            | 58.13 58.02 |
| 2   | Zm00001d011461 | CTAAAAGTACGTGCTTCCCATG  | CGTACTGTACGTCACTTTTTTGG | 82             | 57.98 58.2  |
| 3   | Zm00001d007301 | CGAGGAAGTTGTGATTGCTAAG  | CCTTGCTCTTGTTGATGAAGTC  | 170            | 57.98 58.16 |
| 4   | Zm00001d025509 | ACAAGCACTACAACCTTCGAGTA | TAGGTTTCAGAGTACAAGAGCAC | 89             | 58.01 57.8  |
| 5   | Zm00001d013610 | CAACAAGTGCCTTACACC      | GACGAGGGAGATGTCGAAC     | 283            | 58.1 57.94  |
| 6   | Zm00001d023713 | CCACACGATCAAAAACAAAACC  | GATGAAGCTGGAGTTCATGATG  | 123            | 57.8 57.76  |
| 7   | Zm00001d019358 | TTTACCATTTCATTAGCTGCCG  | CAAACACGACAAATGCATGATG  | 123            | 57.95 58.01 |
| 8   | Zm00001d023887 | CAACATAACAGTCGACGAAACA  | GGCAACACGAACAAATTAACAC  | 174            | 57.87 57.88 |
| 9   | Zm00001d020002 | GTAACAACAGCTTTTGGTACGG  | TGTCAAATACTCAGGGTAGTCG  | 80             | 58.69 57.87 |
| 10  | Zm00001d024301 | GACGAGGATGTTCTACGAGATC  | TATCCTCAGCGTCTTCGACTTC  | 91             | 58.44 60.23 |
| 11  | Zm00001d022456 | GGAAGCTCAACTCGTCCTAATA  | AGTAGTTTCCAGATGTATGCGT  | 100            | 57.94 57.85 |
| 12  | Zm00001d029699 | CAATCAAAGCAAGCAAAAAGAGG | GCCGGGGAGTCTATCTTCTTAT  | 92             | 57.59 59.43 |

#### **Notes:**

1) Primers were designed using Primer Premier 5 Designer software.

**Supplementary Table 4.** The effect of nitrogen supply level on various morphological traits in different maize material at the seedling stage

| Nitrogen application rate            |  | LN       |         | NN      |         |
|--------------------------------------|--|----------|---------|---------|---------|
| Variety                              |  | WT       | Mutant  | WT      | Mutant  |
| Plant height (cm)                    |  | 48.23a   | 36.63b  | 50.15a  | 46.67a  |
| Stem thickness (mm)                  |  | 3.79b    | 2.62c   | 4.61a   | 4.50a   |
| Leaf area                            |  | 28.17b   | 15.53c  | 37.42a  | 38.21a  |
| SPAD                                 |  | 20.60b   | 11.29c  | 34.25a  | 34.15a  |
| Fresh weight above ground (g)        |  | 3.88b    | 2.19c   | 5.36a   | 4.40b   |
| Dry weight of above ground (g)       |  | 0.92a    | 0.73b   | 1.01a   | 0.94a   |
| Fresh weight underground (g)         |  | 1.73a    | 1.74a   | 1.68a   | 1.95a   |
| Underground dry weight (g)           |  | 0.54a    | 0.60a   | 0.38b   | 0.35b   |
| Fresh weight root shoot ratio (%)    |  | 45b      | 80a     | 31c     | 44b     |
| Dry weight root to shoot ratio (%)   |  | 58b      | 81a     | 38c     | 37c     |
| Root length (cm)                     |  | 24.68b   | 32.74a  | 22.24c  | 22.60bc |
| Total root length (cm)               |  | 259.97ab | 259.97a | 238.38b | 231.41b |
| shadow area (cm <sup>2</sup> )       |  | 161.25a  | 127.12b | 125.15b | 122.90b |
| Root surface area (cm <sup>2</sup> ) |  | 462.78a  | 393.32b | 390.83b | 387.30b |
| The average diameter (mm)            |  | 5.35b    | 5.03b   | 6.61a   | 6.04ab  |
| Root volume (cm <sup>3</sup> )       |  | 78.57a   | 56.19b  | 51.55b  | 51.34b  |

**Note:** Significance level is  $P < 0.05$ .

**Supplementary Table 5.** The effect of nitrogen supply level on various morphological traits in different maize materials at the grain-filling stage

| Nitrogen application rate          | LN      |         | NN      |          |
|------------------------------------|---------|---------|---------|----------|
|                                    | WT      | Mutant  | WT      | Mutant   |
| Plant height (cm)                  | 225.66b | 184.67c | 229a    | 227.67ab |
| Stem thickness (mm)                | 26.43a  | 20.6c   | 26.86a  | 24.29b   |
| Leaf area                          | 507.71b | 433.76c | 534.11a | 529.33a  |
| Fresh weight above ground (g)      | 739.56a | 496.3c  | 747.2a  | 682.06b  |
| Dry weight of above ground (g)     | 381.44b | 324.34c | 453.67a | 448.34a  |
| Fresh weight underground (g)       | 86.3a   | 81.42b  | 84.59a  | 78.81c   |
| Underground dry weight (g)         | 25.33a  | 25.42a  | 23.59a  | 22.85b   |
| Fresh weight root shoot ratio (%)  | 11.67a  | 16.41b  | 11.32a  | 11.56a   |
| Dry weight root to shoot ratio (%) | 6.64b   | 7.84a   | 5.21c   | 5.10c    |

**Note:** Significance level is  $P < 0.05$ .
