# Supplementary material for: Integrated Transcriptomic and Proteomic Analyses of Low-Nitrogen-Stress Tolerance and Function Analysis of ZmGST42 Gene in Maize
Source: Antioxidants (Basel). 2023 Oct 5;12(10):1831. doi: 10.3390/antiox12101831 (PMC10603844; doi:10.3390/antiox12101831)
Supplement: Supplementary file 1 [file antioxidants-12-01831-s001.zip]

Archive with 4 entries (4 files):
- Supplementary Figures 1 and 2.pdf
- Supplementary Table 2 - Sheets 1-4.xlsx
- Supplementary Table 3 - Sheets 1-3.xlsx
- Supplementary Tables 1 , 4, and 5.pdf
