# Supplementary material for: Integrated Transcriptomic and Proteomic Analyses of Low-Nitrogen-Stress Tolerance and Function Analysis of ZmGST42 Gene in Maize
Source: Antioxidants (Basel). 2023 Oct 5;12(10):1831. doi: 10.3390/antiox12101831 (PMC10603844; doi:10.3390/antiox12101831)
Supplement: Supplementary file 1 [file antioxidants-12-01831-s001.zip › Supplementary Table 2 - Sheets 1-4.xlsx]

## Sheet: Sheet 1 - Region I
Supplementary Table 2 - The DEGs identified specific to Regions I-IV of Figure 1B-C
No.	Gene ID1	Description2	Log2FC3	p Value4	Expr.5	KEGG Pathway6		No.	Gene ID1	Description2	Log2FC3	p Value4	Expr.5	KEGG Pathway6
1	Zm00001d024533	Putative DEAD-box ATP-dependent RNA helicase family protein	8.72162	5.38665e-12	up	Spliceosome		1	Zm00001d018809	glutathione transferase6	-1.00135	0.0154311	down	Glutathione metabolism
2	ZemaCp020	atpA	6.73597	2.23329e-05	up	Oxidative phosphorylation;Photosynthesis		2	Zm00001d011486	CTP synthase family protein	-1.00169	1.75384e-05	down	Pyrimidine metabolism
3	Zm00001d030822	Cycloartenol synthase	6.51914	4.9762e-05	up	------		3	Zm00001d036328	2-oxoglutarate dehydrogenase E1 component	-1.00234	1.02863e-05	down	Citrate cycle (TCA cycle);Lysine degradation;Tryptophan metabolism
4	Zm00001d008095	------	5.77011	0.000314404	up	------		4	Zm00001d044508	Cysteine-rich receptor-like protein kinase 2	-1.00361	0.000160913	down	------
5	Zm00001d022356	DEAD-box ATP-dependent RNA helicase 57	5.55343	0.000590373	up	------		5	Zm00001d039496	R2R3MYB-domain protein	-1.01369	0.000805379	down	------
6	Zm00001d048699	------	5.44686	0.000710294	up	------		6	Zm00001d017293	------	-1.01404	0.0481389	down	Diterpenoid biosynthesis
7	Zm00001d015823	------	5.16852	0.00608206	up	------		7	Zm00001d019752	hydroxyproline-rich glycoprotein family protein	-1.01461	0.00386738	down	Pentose and glucuronate interconversions
8	ZeamMp010	orf396	5.12573	0.016748	up	------		8	Zm00001d042099	Glutathione S-transferase	-1.01499	0.0111577	down	Glutathione metabolism
9	Zm00001d009230	Poly	5.10593	0.0153432	up	Base excision repair		9	Zm00001d043741	NPK1-related protein kinase-like protein	-1.01574	0.0154326	down	MAPK signaling pathway - plant
10	Zm00001d010287	WAT1-related protein	5.05455	0.00831303	up	------		10	Zm00001d053695	Protein kinase%3B Putative lysM-domain receptor-like protein kinase family protein	-1.0162	0.0457752	down	------
11	Zm00001d042471	General transcription factor 2-related zinc finger protein	4.92973	0.00759982	up	------		11	Zm00001d037455	N-(5'-phosphoribosyl)anthranilate isomerase	-1.02643	0.0333485	down	Phenylalanine, tyrosine and tryptophan biosynthesis
12	Zm00001d052005	Peptide chain release factor PrfB1 chloroplastic	4.85704	0.021898	up	------		12	Zm00001d006570	------	-1.02719	0.00694075	down	------
13	Zm00001d037411	Aspartyl protease AED1	4.78671	0.0149703	up	------		13	Zm00001d032688	Carboxy-lyase	-1.02979	0.00214824	down	------
14	Zm00001d017591	Ethylene-responsive transcription factor ERF025	4.74786	0.0318961	up	------		14	Zm00001d009112	cAMP-regulated phosphoprotein 19-related protein	-1.02986	0.0283738	down	------
15	Zm00001d012152	Galactolipase DONGLE chloroplastic	4.68878	0.0248838	up	------		15	Zm00001d023479	Putative HLH DNA-binding domain superfamily protein	-1.03066	0.000937126	down	------
16	Zm00001d027932	------	4.61177	0.00495194	up	------		16	Zm00001d004664	Cytochrome P450 94B3	-1.03105	0.00258515	down	------
17	Zm00001d044074	Zinc finger CCCH domain-containing protein 14	4.5387	0.0336937	up	------		17	Zm00001d015225	Vacuolar cation/proton exchanger 2	-1.03193	0.0184368	down	------
18	Zm00001d000194	Glycine-rich protein family	4.52551	0.0181346	up	------		18	Zm00001d015091	Bax inhibitor 1	-1.03216	0.0407897	down	------
19	Zm00001d032614	General transcription factor 2-related zinc finger protein	4.47561	0.00553706	up	------		19	Zm00001d014083	Beta-amylase	-1.03227	4.76357e-09	down	Starch and sucrose metabolism
20	Zm00001d021807	Retrovirus-related Pol polyprotein LINE-1	4.44987	0.0221467	up	------		20	Zm00001d034387	aldehyde oxidase1	-1.03321	0.0014782	down	Carotenoid biosynthesis;Tryptophan metabolism
21	Zm00001d029718	Transcription repressor OFP6	4.37885	0.0351917	up	------		21	Zm00001d008651	Pyruvate decarboxylase isozyme 2	-1.04031	0.000319652	down	Glycolysis / Gluconeogenesis
22	Zm00001d015054	terpene synthase3	4.32067	0.0313725	up	Monoterpenoid biosynthesis		22	Zm00001d034940	ABC transporter G family member 34	-1.04284	0.0160891	down	------
23	Zm00001d005749	Probable WRKY transcription factor 40	4.3146	0.0382742	up	------		23	Zm00001d053603	ABC transporter A family member 7	-1.04905	0.000983641	down	------
24	Zm00001d045089	pentatricopeptide repeat protein2263	4.24317	0.00891975	up	------		24	Zm00001d006145	UDP-glycosyltransferase 74B1	-1.0507	0.026285	down	------
25	Zm00001d006132	Formin-like protein 1	4.23229	0.0373507	up	------		25	Zm00001d005926	Threonine endopeptidase	-1.05093	0.0312135	down	------
26	Zm00001d036699	Fasciclin-like arabinogalactan protein 8	4.19841	0.0450511	up	------		26	ENSRNA049478891	5.8S ribosomal RNA	-1.05122	9.38314e-06	down	------
27	Zm00001d012006	------	4.15676	0.0486259	up	------		27	Zm00001d037684	------	-1.05293	0.00233914	down	------
28	Zm00001d032515	Tetratricopeptide repeat (TPR)-like superfamily protein	4.06379	0.0241477	up	------		28	Zm00001d034898	gibberellin 20-oxidase1	-1.05313	0.0127066	down	Diterpenoid biosynthesis
29	Zm00001d024092	------	4.04963	0.0031906	up	------		29	Zm00001d031993	Rhamnogalacturonate lyase family protein	-1.05857	0.045149	down	------
30	Zm00001d018369	Serine carboxypeptidase 24	4.01793	0.0178998	up	------		30	Zm00001d028999	NAC domain containing protein 47	-1.05977	0.000668187	down	------
31	Zm00001d037711	Leucine-rich repeat extensin-like protein 3	4.01345	0.00490049	up	------		31	Zm00001d039364	------	-1.06375	0.00890423	down	------
32	Zm00001d038571	Retrovirus-related Pol polyprotein LINE-1	3.84826	0.0323598	up	------		32	Zm00001d044947	triacylglycerol lipase-like 1	-1.06432	0.00734168	down	------
33	Zm00001d004689	O-methyltransferase ZRP4	3.76162	0.0250868	up	Stilbenoid, diarylheptanoid and gingerol biosynthesis		33	Zm00001d047663	Acetate/butyrate--CoA ligase AAE7 peroxisomal	-1.06646	9.51201e-05	down	------
34	Zm00001d043661	Outer mitochondrial membrane protein porin	3.73577	0.0354313	up	------		34	Zm00001d047952	------	-1.06693	0.0230896	down	------
35	Zm00001d035854	Alpha-dioxygenase 1	3.63583	0.00103081	up	alpha-Linolenic acid metabolism		35	Zm00001d049430	Germin-like protein subfamily 1 member 8	-1.06765	0.0237241	down	------
36	Zm00001d002754	Homeobox-leucine zipper protein ATHB-4	3.62353	0.00732622	up	------		36	Zm00001d044906	12-oxo-phytodienoic acid reductase2	-1.07053	0.00283896	down	alpha-Linolenic acid metabolism
37	Zm00001d000986	------	3.60724	0.0285072	up	------		37	Zm00001d041327	Probable LRR receptor-like serine/threonine-protein kinase	-1.07573	0.0353601	down	------
38	Zm00001d015802	------	3.42755	0.0311499	up	------		38	Zm00001d042260	Chloroplastic quinone-oxidoreductase	-1.07862	0.0159789	down	------
39	Zm00001d053367	AGP16	3.41446	0.0237985	up	------		39	Zm00001d037977	ATP-dependent DNA helicase [Source:UniProtKB/TrEMBL;Acc:A0A1D6M2K1]	-1.07871	0.0359082	down	Mismatch repair;Homologous recombination;Nucleotide excision repair;DNA replication
40	Zm00001d045266	Nuclear pore complex protein NUP155	3.23961	0.0303677	up	RNA transport		40	Zm00001d044683	Probable chalcone--flavonone isomerase 3	-1.08046	0.0419985	down	------
41	Zm00001d023402	Putative MYB DNA-binding domain superfamily protein	3.20131	0.000346408	up	------		41	Zm00001d030555	receptor-like protein kinase 1	-1.08074	0.0123349	down	------
42	Zm00001d038682	PLASMODESMATA CALLOSE-BINDING PROTEIN 2	3.20018	0.0302943	up	------		42	Zm00001d046234	Inositol oxygenase 2	-1.08311	0.001445	down	Ascorbate and aldarate metabolism;Inositol phosphate metabolism
43	Zm00001d024047	Leucine-rich repeat protein kinase family protein	3.1746	0.0470149	up	------		43	Zm00001d022876	------	-1.08623	0.0139857	down	------
44	Zm00001d020650	Protein Brevis radix-like 4	3.15817	0.00175131	up	------		44	Zm00001d045295	ACS-like protein%3B Putative AMP-dependent synthetase and ligase superfamily protein	-1.08635	0.000761502	down	Peroxisome;Fatty acid degradation;Fatty acid biosynthesis
45	Zm00001d025833	Peroxygenase 2	3.15116	0.00504116	up	Cutin, suberine and wax biosynthesis		45	Zm00001d008370	geranylgeranyl pyrophosphate synthase3	-1.09031	0.00262079	down	Terpenoid backbone biosynthesis
46	Zm00001d033022	Retrovirus-related Pol polyprotein LINE-1	3.14264	0.00125082	up	------		46	Zm00001d014250	Protein TIFY 10B	-1.09623	0.0362372	down	Plant hormone signal transduction
47	Zm00001d050852	Retrovirus-related Pol polyprotein LINE-1	3.11401	0.0193114	up	------		47	Zm00001d008210	Germin-like protein subfamily 2 member 1	-1.09701	0.0317288	down	------
48	Zm00001d028537	zinc finger protein-related	3.05109	0.015602	up	------		48	Zm00001d010611	Putative mini-chromosome maintenance (MCM) complex protein family	-1.09832	0.0377735	down	DNA replication
49	Zm00001d027753	SAUR-like auxin-responsive protein family	3.0181	0.0221231	up	Plant hormone signal transduction		49	Zm00001d006604	Nucleic acid-binding OB-fold-like protein	-1.09834	0.0108457	down	------
50	Zm00001d029959	Long chain base biosynthesis protein 2a	2.97039	0.0341861	up	Sphingolipid metabolism		50	Zm00001d038511	gibberellin 1617-oxidase1	-1.09856	5.90665e-05	down	------
51	Zm00001d019001	F-box domain containing protein	2.95762	0.0226634	up	------		51	Zm00001d051174	Aquaporin PIP2-3	-1.10159	0.0419433	down	------
52	Zm00001d013718	------	2.85675	0.000676304	up	Pyrimidine metabolism;Purine metabolism		52	Zm00001d021684	Cysteine-rich receptor-like protein kinase 25	-1.10925	3.02144e-05	down	------
53	Zm00001d039313	Transcription repressor OFP8	2.84466	0.0153683	up	------		53	Zm00001d044387	Transmembrane amino acid transporter family protein	-1.11271	1.12008e-05	down	------
54	Zm00001d038763	UDP-glycosyltransferase 88A1	2.83526	0.0273817	up	------		54	Zm00001d042271	Trihelix transcription factor ASR3	-1.11677	0.0350756	down	------
55	Zm00001d016340	Protein argonaute 1	2.81762	0.0299593	up	------		55	Zm00001d008976	3-methyl-2-oxobutanoate hydroxymethyltransferase 1 mitochondrial	-1.11691	0.0071277	down	Pantothenate and CoA biosynthesis
56	Zm00001d021226	anther-specific protein 3	2.81305	0.015768	up	------		56	Zm00001d032932	IQ-domain 19	-1.11712	0.0200471	down	------
57	Zm00001d014918	GDSL esterase/lipase EXL3	2.80213	0.036675	up	------		57	Zm00001d043596	Lachrymatory-factor synthase	-1.11945	0.00716907	down	------
58	Zm00001d025141	basic helix-loop-helix (bHLH) DNA-binding superfamily protein	2.79505	0.0363596	up	------		58	Zm00001d007399	------	-1.12005	0.00121919	down	------
59	Zm00001d027463	Probable LRR receptor-like serine/threonine-protein kinase	2.7616	0.0204601	up	------		59	Zm00001d013879	------	-1.12013	0.0406605	down	------
60	Zm00001d052918	Ubiquitin-protein ligase/ zinc ion binding protein	2.7612	0.0174206	up	------		60	Zm00001d010687	Protein kinase superfamily protein	-1.12018	0.0123569	down	------
61	Zm00001d023411	myb-like transcription factor family protein	2.75973	9.16715e-05	up	------		61	Zm00001d048948	Hevein-like preproprotein	-1.12023	0.0286374	down	------
62	Zm00001d050875	Retrovirus-related Pol polyprotein LINE-1	2.73774	0.000712719	up	------		62	Zm00001d038471	U-box domain-containing protein 16	-1.12367	4.89958e-05	down	------
63	Zm00001d040297	Rapid alkalinization factor 1	2.65441	0.00900213	up	------		63	Zm00001d049831	Nodulin-like protein	-1.12635	0.0117798	down	------
64	Zm00001d050241	Polygalacturonase 1 beta-like protein 3	2.61573	0.00110103	up	------		64	Zm00001d020780	glutathione transferase23	-1.12646	7.10631e-05	down	Glutathione metabolism
65	Zm00001d054080	Trihelix transcription factor GTL2	2.61534	0.0288232	up	------		65	Zm00001d029778	metallothionein2	-1.12858	0.0177344	down	------
66	Zm00001d030086	Tetratricopeptide repeat (TPR)-like superfamily protein	2.58303	0.0109202	up	------		66	Zm00001d003508	Steroid nuclear receptor ligand-binding	-1.12913	0.00296335	down	------
67	Zm00001d047339	Putative AP2/EREBP transcription factor superfamily protein	2.57772	0.04637	up	------		67	Zm00001d029339	Transcription factor bHLH47	-1.12948	1.3773e-05	down	------
68	Zm00001d007745	S-receptor kinase1	2.54655	0.0206635	up	------		68	Zm00001d032753	Zinc finger (C3HC4-type RING finger) family protein	-1.13081	0.0145548	down	------
69	Zm00001d009309	Xyloglucan endotransglucosylase/hydrolase protein 14	2.48174	0.0312997	up	Plant hormone signal transduction		69	Zm00001d013934	soluble epoxide hydrolase	-1.13116	0.0180229	down	------
70	Zm00001d013800	------	2.45821	0.0189693	up	------		70	ENSRNA049478786	5.8S ribosomal RNA	-1.13431	0.0406378	down	------
71	Zm00001d034526	------	2.43954	0.046664	up	------		71	Zm00001d032230	terpene synthase7	-1.13464	2.06379e-05	down	------
72	Zm00001d016068	Peptide chain release factor PrfB1 chloroplastic	2.36947	0.0299663	up	------		72	ENSRNA049477405	Eukaryotic small subunit ribosomal RNA	-1.13507	5.56139e-07	down	------
73	Zm00001d026554	Heavy metal transport/detoxification superfamily protein	2.36627	0.0208758	up	------		73	Zm00001d044442	ABC transporter G family member 40	-1.14573	0.000219908	down	------
74	Zm00001d044373	Leucine-rich repeat extensin-like protein 3	2.34107	0.0489246	up	------		74	Zm00001d037766	------	-1.15007	0.0331011	down	------
75	Zm00001d006180	NC domain-containing protein-related	2.33816	0.0156798	up	------		75	Zm00001d010579	Putative calcium-dependent protein kinase family protein	-1.15307	0.0339938	down	Plant-pathogen interaction
76	Zm00001d030339	Peptidyl-prolyl cis-trans isomerase	2.31325	0.00182122	up	------		76	Zm00001d013098	aldehyde oxidase2	-1.15634	2.70271e-05	down	Tryptophan metabolism
77	Zm00001d023223	Ferritin-2 chloroplastic	2.28693	5.01859e-07	up	------		77	Zm00001d053757	Galactose mutarotase-like superfamily protein	-1.15875	0.001481	down	Glycolysis / Gluconeogenesis
78	Zm00001d011461	uncharacterized protein [Source:UniProtKB/TrEMBL;Acc:B6SMQ8]	2.25632	6.58278e-07	up	------		78	Zm00001d004810	FHA domain-containing protein PS1	-1.16176	0.0173538	down	------
79	Zm00001d048136	------	2.24378	6.35382e-05	up	------		79	Zm00001d053212	E3 ubiquitin ligase BIG BROTHER-related	-1.1622	0.00186067	down	------
80	Zm00001d024607	Ae3%3B Ae3 protein%3B Androgenic embryo3	2.23848	0.0383771	up	------		80	Zm00001d033517	Major facilitator superfamily protein	-1.16283	0.0087414	down	------
81	Zm00001d019668	P-loop containing nucleoside triphosphate hydrolases superfamily protein	2.23404	0.0361571	up	------		81	ENSRNA049479871	Eukaryotic small subunit ribosomal RNA	-1.16322	0.00662359	down	------
82	Zm00001d035864	------	2.20284	0.0168624	up	Sphingolipid metabolism		82	Zm00001d018926	Bifunctional inhibitor/lipid-transfer protein/seed storage 2S albumin superfamily protein	-1.16575	0.0297946	down	------
83	Zm00001d009567	Fasciclin-like arabinogalactan protein 7	2.19531	0.010238	up	------		83	Zm00001d019457	CASP-like protein 1D1	-1.16896	0.0179444	down	------
84	Zm00001d025958	Aldehyde dehydrogenase	2.16472	0.047862	up	Lysine degradation;Valine, leucine and isoleucine degradation;Arginine and proline metabolism;Limonene and pinene degradation;Ascorbate and aldarate metabolism;Tryptophan metabolism;Glycolysis / Gluconeogenesis;Pyruvate metabolism;Fatty acid degradation;Histidine metabolism;Glycerolipid metabolism;beta-Alanine metabolism		84	Zm00001d025788	BTB/POZ domain-containing protein	-1.16917	0.0175615	down	------
85	Zm00001d044623	Cation/H(+) antiporter 14	2.15055	0.0417194	up	------		85	Zm00001d016551	Leucine aminopeptidase 2 chloroplastic	-1.17182	0.0251132	down	Glutathione metabolism
86	Zm00001d020492	Probable WRKY transcription factor 40	2.12953	0.00423809	up	------		86	Zm00001d033320	UDP-glycosyltransferase 91A1	-1.17279	0.000426084	down	------
87	Zm00001d026140	Putative subtilase family protein	2.11688	0.0337205	up	------		87	Zm00001d042104	glutathione transferase7	-1.17329	0.0486406	down	Glutathione metabolism
88	Zm00001d027370	------	2.10604	0.0460418	up	------		88	Zm00001d035603	UPA23	-1.17624	0.0459723	down	------
89	Zm00001d024800	------	2.10219	0.026108	up	------		89	Zm00001d052224	Wound/stress protein	-1.17675	0.00183412	down	------
90	Zm00001d052064	Glutamate receptor 2.7	2.09656	0.0339155	up	------		90	ENSRNA049479875	Eukaryotic small subunit ribosomal RNA	-1.17939	0.0119275	down	------
91	zma-MIR398b	------	2.08149	0.0199195	up	------		91	Zm00001d044021	Isocitrate dehydrogenase	-1.18135	0.0138999	down	Citrate cycle (TCA cycle);Glutathione metabolism;Peroxisome
92	Zm00001d017027	Formin-like protein 18	2.07359	0.0370653	up	------		92	Zm00001d038049	Lichenase-2%3B Putative O-Glycosyl hydrolase superfamily protein	-1.18277	0.0224174	down	------
93	Zm00001d037513	germin-like protein1	2.07059	0.00391439	up	------		93	Zm00001d024208	Alpha-humulene/(-)-(E)-beta-caryophyllene synthase	-1.18404	0.0126752	down	Sesquiterpenoid and triterpenoid biosynthesis
94	Zm00001d033222	viviparous14	2.06604	3.22159e-06	up	Carotenoid biosynthesis		94	Zm00001d008925	GDSL esterase/lipase	-1.19182	2.47088e-07	down	Indole alkaloid biosynthesis
95	Zm00001d006815	------	2.0596	0.0373396	up	------		95	Zm00001d039739	Annexin D8	-1.19382	0.0457335	down	------
96	Zm00001d023839	binding	2.03434	0.045341	up	------		96	Zm00001d012510	Putative cytochrome P450 superfamily protein	-1.19476	0.00108438	down	Stilbenoid, diarylheptanoid and gingerol biosynthesis;Ubiquinone and other terpenoid-quinone biosynthesis;Phenylpropanoid biosynthesis;Flavonoid biosynthesis;Phenylalanine metabolism
97	Zm00001d000044	U-box domain-containing protein 31	2.03212	0.00696985	up	------		97	Zm00001d010218	Peroxidase 53	-1.20031	0.0253008	down	Phenylpropanoid biosynthesis
98	Zm00001d045661	Zinc finger protein CONSTANS-LIKE 16	2.01053	2.86749e-06	up	------		98	Zm00001d012509	Clathrin heavy chain 2	-1.20381	0.00682426	down	Endocytosis
99	Zm00001d030222	------	1.92507	0.0308268	up	------		99	Zm00001d016433	------	-1.20393	0.0429347	down	------
100	Zm00001d007509	O-Glycosyl hydrolases family 17 protein	1.89759	0.0301483	up	------		100	Zm00001d002614	SPX domain-containing membrane protein	-1.20981	0.0431395	down	------
101	Zm00001d013480	------	1.88133	0.0313215	up	------		101	Zm00001d024789	(Z)-3-hexen-1-ol acetyltransferase	-1.21307	7.04616e-05	down	------
102	Zm00001d014495	------	1.86984	0.00704424	up	------		102	Zm00001d005936	E3 ubiquitin-protein ligase ATL6	-1.21351	0.00562688	down	------
103	Zm00001d025721	Mitotic spindle checkpoint protein MAD2	1.82821	0.00984235	up	------		103	Zm00001d047350	Alpha/beta hydrolase related protein	-1.21414	0.0109445	down	------
104	Zm00001d029602	LOB domain-containing protein 38	1.79613	0.00105182	up	------		104	Zm00001d007180	Cytochrome P450 714A1	-1.22063	1.23412e-05	down	------
105	Zm00001d028808	senescence associated gene 20	1.78719	0.00258618	up	------		105	Zm00001d034725	Haloacid dehalogenase-like hydrolase (HAD) superfamily protein	-1.22149	0.00237094	down	Nicotinate and nicotinamide metabolism
106	Zm00001d005937	------	1.78385	0.0342949	up	Amino sugar and nucleotide sugar metabolism		106	Zm00001d046812	Chaperone protein dnaJ 8 chloroplastic	-1.2236	0.0103399	down	------
107	Zm00001d043793	Transcription initiation factor IIB-2	1.78352	0.0380723	up	Basal transcription factors		107	Zm00001d024672	Putative RING finger and ARM repeat-containing protein containing family protein	-1.22375	0.0324764	down	------
108	Zm00001d012980	NAD(P)-binding Rossmann-fold superfamily protein	1.77478	5.05473e-06	up	------		108	Zm00001d020953	Protein PIN-LIKES 3	-1.22673	0.00235437	down	------
109	Zm00001d031457	DNA-directed RNA polymerase IV subunit 1	1.77027	0.000585633	up	------		109	Zm00001d047005	DUF241 domain protein	-1.2276	0.0203104	down	------
110	Zm00001d023801	DNA polymerase alpha 2	1.76681	0.0329446	up	Purine metabolism;Pyrimidine metabolism;DNA replication		110	Zm00001d012255	Putative MYB DNA-binding domain superfamily protein	-1.23042	0.0245972	down	------
111	Zm00001d052612	Protein SMAX1-LIKE 3	1.75975	0.00583728	up	------		111	Zm00001d049381	Adhesive/proline-rich protein%3B Proline-rich family protein	-1.23113	0.00798558	down	------
112	Zm00001d047930	------	1.75399	0.000603266	up	------		112	Zm00001d046824	------	-1.2324	0.00109723	down	------
113	Zm00001d028510	Protein FAF-like chloroplastic	1.73765	0.0108212	up	------		113	Zm00001d035222	------	-1.23248	0.028884	down	------
114	Zm00001d031068	Protein kinase PINOID	1.73383	0.0147636	up	------		114	Zm00001d039081	CTP synthase family protein	-1.23449	3.53948e-05	down	Pyrimidine metabolism
115	Zm00001d019855	Anther-specific proline-rich protein APG	1.73317	0.0396257	up	------		115	Zm00001d038488	------	-1.23603	0.0221671	down	------
116	Zm00001d039786	------	1.70869	0.00242451	up	------		116	Zm00001d036197	HXXXD-type acyl-transferase family protein	-1.23678	0.00768952	down	------
117	Zm00001d050698	------	1.70541	0.00224618	up	------		117	Zm00001d031949	------	-1.23748	0.0282076	down	------
118	Zm00001d045344	Pyridoxal-5'-phosphate-dependent enzyme family protein	1.70157	0.00245398	up	Cysteine and methionine metabolism;Sulfur metabolism		118	Zm00001d051670	RPM1-interacting protein 4 (RIN4) family protein	-1.24013	0.0471814	down	------
119	Zm00001d003379	Major latex protein 22%3B Pathogenesis-related protein 2	1.67375	2.83161e-05	up	------		119	Zm00001d045092	Spermidine hydroxycinnamoyl transferase	-1.24459	0.0296853	down	Flavonoid biosynthesis;Phenylpropanoid biosynthesis;Stilbenoid, diarylheptanoid and gingerol biosynthesis
120	Zm00001d047096	Expansin-B4	1.66163	0.00829144	up	------		120	Zm00001d032946	Chitinase 1	-1.24613	0.0154049	down	------
121	Zm00001d014601	Peroxidase 16	1.65357	0.0362468	up	Phenylpropanoid biosynthesis		121	Zm00001d041972	Cellulose synthase-like protein G3	-1.24926	0.00321072	down	------
122	Zm00001d018656	Probable WRKY transcription factor 57	1.63379	0.049619	up	------		122	Zm00001d043512	Protein kinase family protein with leucine-rich repeat domain	-1.25389	0.0247727	down	------
123	Zm00001d033987	Heat stress transcription factor A-6b	1.62962	0.000935147	up	------		123	Zm00001d000582	------	-1.2547	0.0270759	down	------
124	Zm00001d003811	Two-component response regulator-like APRR1	1.62815	0.0149486	up	Circadian rhythm - plant		124	Zm00001d016942	UDP-glycosyltransferase 85A7	-1.25575	0.0130822	down	Monoterpenoid biosynthesis
125	Zm00001d004330	------	1.61266	0.028445	up	------		125	Zm00001d043411	gibberellin 2-oxidase3	-1.25822	0.000266889	down	Diterpenoid biosynthesis
126	Zm00001d050705	------	1.59794	0.047363	up	------		126	Zm00001d046299	HSF28 HSF type transcription factor	-1.26913	0.0453501	down	------
127	Zm00001d046184	Peroxidase 52	1.57952	0.0333411	up	Phenylpropanoid biosynthesis		127	Zm00001d017425	Cytochrome b5	-1.27182	0.0167879	down	------
128	Zm00001d051172	Auxin response factor 16	1.57899	3.28606e-05	up	------		128	Zm00001d007329	Probable WRKY transcription factor 75	-1.2719	0.00059465	down	------
129	Zm00001d005300	Transcription factor MYB44	1.57486	0.00616946	up	------		129	Zm00001d019608	------	-1.27501	0.0323468	down	------
130	Zm00001d034116	Transcription initiation factor IIB-2	1.57082	0.0298075	up	Basal transcription factors		130	Zm00001d027996	Alcohol dehydrogenase-like 2	-1.27888	0.0224361	down	Glycolysis / Gluconeogenesis;Fatty acid degradation;Tyrosine metabolism
131	Zm00001d048993	Putative alpha-L-arabinofuranosidase family protein	1.53837	0.0237931	up	Amino sugar and nucleotide sugar metabolism		131	Zm00001d042958	CCT motif family protein	-1.27948	9.31228e-06	down	------
132	Zm00001d023302	Putative pentatricopeptide repeat-containing protein	1.52616	0.0465465	up	------		132	Zm00001d014650	Disease resistance protein RPM1	-1.28062	0.0354597	down	Plant-pathogen interaction
133	Zm00001d049374	F-box domain containing protein	1.51627	0.0149774	up	------		133	Zm00001d048559	glutathione transferase35	-1.28328	0.00507598	down	Glutathione metabolism
134	Zm00001d026084	IQ-domain 23	1.50408	0.00163803	up	------		134	Zm00001d052060	trehalose-6-phosphate synthase10	-1.28969	7.50386e-05	down	Starch and sucrose metabolism
135	Zm00001d042637	Leucine-rich receptor-like protein kinase family protein	1.49062	0.00022091	up	------		135	Zm00001d034418	Acyl-CoA N-acyltransferases (NAT) superfamily protein	-1.2909	0.002825	down	------
136	Zm00001d037561	Replication protein A 70 kDa DNA-binding subunit B	1.48067	0.0311809	up	Mismatch repair;Homologous recombination;Nucleotide excision repair;DNA replication		136	Zm00001d049073	NifS-like protein	-1.3072	0.0140667	down	------
137	Zm00001d021177	------	1.47559	0.00379632	up	------		137	Zm00001d027622	Zinc finger (C3HC4-type RING finger) family protein	-1.30824	0.0388404	down	------
138	Zm00001d008672	Cycloartenol synthase	1.45674	0.00195638	up	Steroid biosynthesis		138	Zm00001d019060	deoxy xylulose synthase 2	-1.31275	1.31397e-06	down	Thiamine metabolism;Terpenoid backbone biosynthesis
139	Zm00001d041735	Expressed protein; protein	1.45472	0.0194486	up	------		139	Zm00001d024265	F-box protein SKIP19	-1.31483	0.000924929	down	------
140	Zm00001d047680	Calmodulin-binding protein 60 G	1.4463	0.032328	up	------		140	Zm00001d012909	soluble epoxide hydrolase	-1.31769	0.0244938	down	------
141	Zm00001d047228	------	1.44602	0.0186869	up	------		141	Zm00001d051917	Phosphatidylinositol N-acetyglucosaminlytransferase subunit P-related	-1.31848	2.54403e-06	down	------
142	Zm00001d034022	Tubulin beta-4 chain	1.4262	9.95437e-06	up	Phagosome		142	Zm00001d052767	PLC-like phosphodiesterases superfamily protein	-1.31859	9.09756e-05	down	------
143	Zm00001d010265	Putative cytochrome P450 superfamily protein	1.41909	0.00801624	up	Steroid biosynthesis		143	Zm00001d001022	------	-1.31877	0.00350303	down	------
144	Zm00001d030270	Probable alpha-mannosidase	1.41385	0.00265369	up	Other glycan degradation		144	Zm00001d041604	bZIP transcription factor 53	-1.31892	0.000464818	down	------
145	Zm00001d024980	Phosphoenolpyruvate carboxylase 3	1.38266	0.00479444	up	Pyruvate metabolism;Carbon fixation in photosynthetic organisms		145	Zm00001d047201	Serine carboxypeptidase-like 40	-1.32416	0.000350614	down	------
146	Zm00001d005624	Delta(8)-fatty-acid desaturase 2	1.37369	0.0144221	up	------		146	Zm00001d048066	Sec14p-like phosphatidylinositol transfer family protein	-1.32462	0.000140089	down	------
147	Zm00001d041309	Probable cyclic nucleotide-gated ion channel 5	1.37162	0.0385463	up	Plant-pathogen interaction		147	Zm00001d026042	Probable purine permease 11	-1.32552	3.72072e-06	down	------
148	Zm00001d012814	------	1.36964	0.00100073	up	------		148	Zm00001d012322	cytochrome P450 family 81 subfamily D polypeptide 8	-1.32615	8.92972e-05	down	------
149	Zm00001d016301	Inorganic pyrophosphatase 1	1.36817	0.0291518	up	Vitamin B6 metabolism		149	ENSRNA049478822	Eukaryotic small subunit ribosomal RNA	-1.32673	0.0134135	down	------
150	Zm00001d046188	AT5g56980/MHM17_10	1.36531	0.0243491	up	------		150	ZeamMr001	rrn16-ct16S ribosomal RNA	-1.32875	0.00847898	down	------
151	Zm00001d015914	sugars will eventually be exported transporter4b	1.3633	0.00759697	up	------		151	ENSRNA049478881	Eukaryotic small subunit ribosomal RNA	-1.33488	0.00247631	down	------
152	Zm00001d050475	Cyclin-D2-1	1.36315	0.0427992	up	------		152	Zm00001d021168	UDP-glycosyltransferase 74B1	-1.33939	0.0131437	down	------
153	Zm00001d052893	Protein EMSY-LIKE 4	1.36297	0.0374063	up	------		153	Zm00001d048191	Membrane protein	-1.33942	0.0251762	down	------
154	Zm00001d041489	Homeobox-leucine zipper protein ATHB-14	1.36292	0.0198975	up	------		154	Zm00001d048947	pathogenesis-related protein3	-1.34156	0.0242567	down	------
155	Zm00001d047696	senescence associated gene 20	1.35745	0.0129437	up	------		155	Zm00001d043216	Subtilisin-like serine endopeptidase family protein	-1.34355	0.0335637	down	------
156	Zm00001d033057	------	1.34548	0.0340681	up	------		156	Zm00001d042739	Anthocyanidin 3-O-glucosyltransferase	-1.35212	0.00289093	down	------
157	Zm00001d011740	Senescence-associated protein 12	1.33612	0.0396819	up	------		157	ENSRNA049479097	5.8S ribosomal RNA	-1.35825	0.00527732	down	------
158	Zm00001d034262	Retrovirus-related Pol polyprotein LINE-1	1.33226	0.03159	up	------		158	Zm00001d045738	Zinc finger protein 6	-1.35877	0.0301976	down	------
159	Zm00001d014745	late embryogenesis abundant protein	1.32811	0.0372606	up	------		159	Zm00001d016950	NAC30 NAC type transcription factor	-1.36419	0.0458441	down	------
160	Zm00001d035172	Disease resistance protein RPM1	1.32569	0.0256138	up	Plant-pathogen interaction		160	ZeamMp032	nad4	-1.36663	0.0336141	down	Oxidative phosphorylation
161	Zm00001d049813	Triacylglycerol lipase 2	1.31579	0.000870361	up	Steroid biosynthesis		161	Zm00001d042572	------	-1.36808	0.0375772	down	------
162	Zm00001d038688	Rho-related protein6	1.3094	0.00112434	up	Phagosome;AGE-RAGE signaling pathway in diabetic complications		162	ZemaCp091	ndhA	-1.37242	0.0267109	down	Oxidative phosphorylation
163	Zm00001d049884	Histone-lysine N-methyltransferase SUVR4	1.30216	0.00273691	up	------		163	Zm00001d011687	IAA-amino acid hydrolase ILR1-like 4	-1.37693	0.00258412	down	------
164	Zm00001d036689	RNA-directed DNA polymerase (reverse transcriptase)	1.30187	0.0129189	up	------		164	Zm00001d008974	Mitochondrial arginine transporter BAC2	-1.38064	0.000942469	down	------
165	Zm00001d024474	Probable acyl-activating enzyme 17 peroxisomal	1.29925	0.0430114	up	------		165	Zm00001d027946	hydroxycinnamoyltransferase1	-1.38264	0.000267164	down	Flavonoid biosynthesis;Phenylpropanoid biosynthesis;Stilbenoid, diarylheptanoid and gingerol biosynthesis
166	Zm00001d000299	Endosomal targeting BRO1-like domain-containing protein	1.29763	0.0144532	up	------		166	Zm00001d046566	Nuclear pore complex protein NUP96	-1.38342	0.0151648	down	RNA transport
167	Zm00001d043336	Probable xyloglucan glycosyltransferase 12	1.29756	0.00929662	up	------		167	Zm00001d042244	Potasium ion uptake permease 1	-1.38602	0.0248159	down	------
168	Zm00001d053087	G-type lectin S-receptor-like serine/threonine-protein kinase SD2-5	1.29279	0.000281625	up	------		168	Zm00001d013830	cytochrome P450 family 76 subfamily C polypeptide 7	-1.38953	0.0014205	down	------
169	Zm00001d045098	BTB/POZ domain-containing protein NPY1	1.2892	0.0486002	up	------		169	Zm00001d025057	NAD(P)-linked oxidoreductase superfamily protein	-1.39015	0.000254101	down	------
170	Zm00001d049179	O-methyltransferase ZRP4	1.2885	0.000685365	up	Benzoxazinoid biosynthesis;Stilbenoid, diarylheptanoid and gingerol biosynthesis		170	Zm00001d001139	------	-1.39127	0.0226219	down	------
171	Zm00001d046281	------	1.28323	0.0296079	up	------		171	Zm00001d034641	ZFP16-2	-1.39296	0.0297035	down	------
172	Zm00001d034672	Putative L-type lectin-domain containing receptor kinase V.1	1.28196	0.0131243	up	------		172	ENSRNA049478203	Eukaryotic small subunit ribosomal RNA	-1.39365	0.0162171	down	------
173	Zm00001d032163	Mitochondrial glycoprotein family protein	1.28137	0.0363088	up	------		173	Zm00001d033455	Protein P21	-1.39552	1.05846e-10	down	------
174	Zm00001d012328	hAT transposon superfamily protein	1.27327	0.0169202	up	------		174	Zm00001d048189	Sulfate transporter 1.2	-1.3965	0.0237983	down	------
175	Zm00001d003945	mouse DNA EBV homolog1	1.27254	0.000888431	up	------		175	Zm00001d037005	Putative FAD-binding Berberine family protein	-1.39894	0.00254441	down	------
176	Zm00001d007554	Protein phosphatase 2C family protein	1.26456	0.049417	up	------		176	ENSRNA049479027	Eukaryotic small subunit ribosomal RNA	-1.39981	0.00624478	down	------
177	Zm00001d042978	Pentatricopeptide repeat-containing protein chloroplastic	1.25024	8.78133e-05	up	------		177	ENSRNA049479581	Eukaryotic small subunit ribosomal RNA	-1.4023	0.0347028	down	------
178	Zm00001d016238	------	1.2497	0.0404222	up	------		178	Zm00001d017991	------	-1.40332	0.000348124	down	------
179	Zm00001d027763	Plant-specific domain TIGR01615 family protein	1.24012	0.0047237	up	------		179	Zm00001d050885	Beta-13-galactosyltransferase GALT1	-1.40528	0.0208817	down	------
180	Zm00001d034405	Probable inactive leucine-rich repeat receptor-like protein kinase	1.23957	0.0224975	up	------		180	ZemaCr119	ZemaCr11923S ribosomal RNA	-1.418	0.0123465	down	------
181	Zm00001d008721	Adenine nucleotide alpha hydrolases-like superfamily protein	1.22963	2.2796e-05	up	------		181	Zm00001d052543	bZIP transcription factor family protein	-1.41884	1.86635e-05	down	Plant hormone signal transduction
182	Zm00001d022035	Cysteine proteinases superfamily protein	1.22803	0.000164194	up	Phagosome		182	Zm00001d006688	Putative polyol transporter 1	-1.42263	0.000239233	down	------
183	Zm00001d032358	auxin-responsive family protein	1.21867	0.024878	up	------		183	Zm00001d002342	Polygalacturonase QRT3	-1.43656	0.000709285	down	------
184	Zm00001d011550	Putative S-locus-like receptor protein kinase family protein	1.21777	0.0265	up	------		184	Zm00001d013326	------	-1.43704	0.012644	down	------
185	Zm00001d003380	Gibberellin-regulated protein 14	1.21422	0.0180531	up	------		185	Zm00001d000195	Putative MATE efflux family protein	-1.43968	0.0448349	down	------
186	Zm00001d023331	Pentatricopeptide repeat-containing protein	1.20781	0.00859883	up	------		186	Zm00001d021929	geranylgeranyl pyrophosphate synthase2	-1.44164	0.0112105	down	Terpenoid backbone biosynthesis
187	Zm00001d029783	Expansin-like A2	1.20735	0.0086608	up	------		187	Zm00001d013115	------	-1.44786	0.0268492	down	SNARE interactions in vesicular transport
188	Zm00001d001492	------	1.20059	0.00732845	up	------		188	Zm00001d026147	plant color component at R1	-1.45271	0.0259757	down	------
189	Zm00001d020497	CBL-interacting serine/threonine-protein kinase 6	1.19909	4.2228e-05	up	------		189	Zm00001d004524	------	-1.45388	0.0219151	down	------
190	Zm00001d010075	Tetratricopeptide repeat (TPR)-like superfamily protein	1.19782	0.00737105	up	------		190	Zm00001d029397	phospholipase D7	-1.45949	1.00866e-06	down	Ether lipid metabolism;Glycerophospholipid metabolism;Endocytosis
191	Zm00001d008905	Peptide-N4-(N-acetyl-beta-glucosaminyl)asparagine amidase A protein	1.19058	0.0127805	up	------		191	ZeamMp163	atp1-a1	-1.46124	0.00440027	down	Oxidative phosphorylation
192	Zm00001d048494	Hydroxymethylglutaryl-CoA synthase%3B Putative hydroxymethylglutaryl-CoA synthase family protein isoform 1%3B Putative hydroxymethylglutaryl-CoA synthase family protein isoform 2%3B Putative hydroxymethylglutaryl-CoA synthase family protein isoform 3	1.18268	3.38566e-07	up	Synthesis and degradation of ketone bodies;Valine, leucine and isoleucine degradation;Butanoate metabolism;Terpenoid backbone biosynthesis		192	Zm00001d028815	Pathogenesis-related protein 10 [Source:UniProtKB/TrEMBL;Acc:Q29SB6]	-1.46779	0.0238311	down	------
193	Zm00001d053880	Protein CHLOROPLAST IMPORT APPARATUS 2	1.18114	1.61291e-05	up	------		193	Zm00001d006535	Cysteine-rich receptor-like protein kinase 10	-1.46935	0.0316152	down	------
194	Zm00001d051367	F-box protein	1.18081	0.00365551	up	------		194	Zm00001d040787	Abscisic stress-ripening protein 1	-1.47391	0.0309815	down	------
195	Zm00001d046500	SPX domain-containing protein 1	1.17543	0.00170309	up	------		195	Zm00001d021135	phosphatidylethanolamine-binding protein24	-1.47983	0.0420944	down	Circadian rhythm - plant
196	Zm00001d038312	Integral membrane Yip1 family protein	1.17524	0.0232618	up	------		196	Zm00001d023769	Delta(12)-fatty-acid desaturase	-1.48234	0.0281481	down	Biosynthesis of unsaturated fatty acids
197	Zm00001d001820	protochlorophyllide reductase1	1.17306	0.00443672	up	Porphyrin and chlorophyll metabolism		197	ZemaCr114	ZemaCr11423S ribosomal RNA	-1.48258	0.0145382	down	------
198	Zm00001d005008	Ulp1 protease family C-terminal catalytic domain containing protein expressed	1.17214	0.0196946	up	------		198	Zm00001d021727	G-type lectin S-receptor-like serine/threonine-protein kinase B120	-1.48659	0.0205742	down	------
199	Zm00001d008478	------	1.17035	0.0255685	up	------		199	Zm00001d000452	------	-1.49018	0.000692876	down	------
200	Zm00001d022166	Putative CDPK-related protein kinase	1.16835	2.46461e-06	up	------		200	Zm00001d011319	ABC transporter G family member 40	-1.49082	0.038201	down	------
201	Zm00001d049692	Agamous-like MADS-box protein AGL12	1.16663	0.00900763	up	------		201	Zm00001d012603	Methylesterase 3	-1.49508	9.11646e-05	down	Indole alkaloid biosynthesis
202	Zm00001d013676	Nuclear transcription factor Y subunit A-10	1.16076	0.0102288	up	------		202	Zm00001d049028	Chitinase 2	-1.49772	0.0251933	down	------
203	Zm00001d037835	Pollen allergen Phl p 11	1.15861	0.0302678	up	------		203	Zm00001d021647	ABC transporter G family member 34	-1.49914	0.0240369	down	------
204	Zm00001d022390	Eukaryotic aspartyl protease family protein	1.15786	0.00293752	up	------		204	Zm00001d023768	Delta(12)-fatty-acid desaturase	-1.50226	0.0380137	down	Biosynthesis of unsaturated fatty acids
205	Zm00001d011589	NAC domain-containing protein 72	1.15644	0.00970561	up	------		205	Zm00001d021949	BTB/POZ domain-containing protein	-1.50716	0.000263151	down	------
206	Zm00001d052348	Cysteine-rich receptor-like protein kinase 26	1.15239	0.0241397	up	------		206	Zm00001d024412	NADPH--cytochrome P450 reductase	-1.50767	0.00021005	down	------
207	Zm00001d004526	------	1.14873	0.00369767	up	------		207	Zm00001d023811	Pathogenesis-related protein STH-21	-1.51095	0.0318324	down	------
208	Zm00001d040171	------	1.14567	0.00345082	up	------		208	Zm00001d021683	Cysteine-rich receptor-like protein kinase 25	-1.51402	0.00566126	down	------
209	Zm00001d033543	Integral membrane HPP family protein	1.144	2.15113e-10	up	------		209	ENSRNA049478739	Eukaryotic small subunit ribosomal RNA	-1.5193	0.0244747	down	------
210	Zm00001d046322	Putative FAD-binding Berberine family protein	1.14258	0.00124729	up	------		210	Zm00001d029617	ZCF37	-1.52672	0.0157704	down	------
211	Zm00001d036788	Subtilisin-like protease SBT4.4	1.13644	0.000486688	up	------		211	Zm00001d033924	------	-1.53654	0.0107796	down	------
212	Zm00001d040125	phosphate transporter1	1.13448	0.00630752	up	------		212	Zm00001d041082	kaurene synthase4	-1.54148	0.0288478	down	Diterpenoid biosynthesis
213	Zm00001d011546	Replication protein-like	1.1308	0.0358578	up	Mismatch repair;Homologous recombination;Nucleotide excision repair;DNA replication		213	Zm00001d011782	Haloacid dehalogenase-like hydrolase (HAD) superfamily protein	-1.54521	3.14914e-09	down	------
214	Zm00001d039994	Alpha-xylosidase 1	1.13062	0.00331891	up	------		214	Zm00001d036879	Putative CBL-interacting protein kinase family protein	-1.54951	0.00330076	down	------
215	Zm00001d021655	WAT1-related protein	1.12966	0.000728376	up	------		215	Zm00001d031228	------	-1.54972	0.0497618	down	------
216	Zm00001d009549	Rop guanine nucleotide exchange factor 9	1.12273	0.00651919	up	------		216	Zm00001d023779	3-hydroxyisobutyryl-CoA hydrolase 1	-1.55132	0.00766177	down	Valine, leucine and isoleucine degradation;beta-Alanine metabolism;Propanoate metabolism
217	Zm00001d024471	------	1.12191	1.49405e-05	up	------		217	Zm00001d012024	Nucleotide-diphospho-sugar transferase family protein	-1.56288	0.00168956	down	------
218	Zm00001d043621	Phosphatase phospho1	1.12165	4.44571e-05	up	Glycerophospholipid metabolism		218	ENSRNA049459300	Eukaryotic large subunit ribosomal RNA	-1.56301	0.0192354	down	------
219	Zm00001d032825	------	1.12127	0.0448852	up	------		219	Zm00001d019704	------	-1.5714	0.00293469	down	------
220	Zm00001d007335	ATP-dependent DNA helicase DDM1	1.11837	0.0161832	up	------		220	Zm00001d029699	glutathione transferase42	-1.57829	1.00291e-05	down	Glutathione metabolism
221	Zm00001d044752	Probable galacturonosyltransferase-like 9	1.11641	0.0257589	up	------		221	Zm00001d025566	------	-1.57931	0.0271637	down	------
222	Zm00001d018883	Probable inactive leucine-rich repeat receptor-like protein kinase	1.11417	0.00747767	up	------		222	Zm00001d022636	Major facilitator superfamily protein	-1.57947	0.0025439	down	------
223	Zm00001d048205	RING/U-box superfamily protein	1.11215	0.0016778	up	------		223	Zm00001d030212	Cysteine-rich receptor-like protein kinase 10	-1.58236	0.0151936	down	------
224	Zm00001d012211	Probable methyltransferase PMT25	1.10469	1.57919e-06	up	------		224	ENSRNA049468238	Eukaryotic large subunit ribosomal RNA	-1.58647	0.016561	down	------
225	Zm00001d017894	Pentatricopeptide repeat-containing protein mitochondrial	1.10217	0.0466774	up	------		225	Zm00001d035553	ABC transporter G family member 6	-1.59071	0.0408862	down	------
226	Zm00001d048726	Tropinone reductase 2	1.09958	0.0019527	up	Tropane, piperidine and pyridine alkaloid biosynthesis		226	Zm00001d034095	cytochrome P450 family 81 subfamily D polypeptide 8	-1.59213	0.0267772	down	------
227	Zm00001d043423	Transcription factor TCP4	1.09722	0.00496846	up	------		227	Zm00001d052545	------	-1.59282	0.000348396	down	------
228	Zm00001d025241	farnesylated protein 3	1.09383	0.0071617	up	------		228	Zm00001d002035	Endonuclease 2	-1.59397	0.037577	down	------
229	Zm00001d023723	DNAJ protein JJJ1 homolog	1.09087	0.0309309	up	------		229	Zm00001d044695	Protein trichome birefringence-like 10	-1.59411	0.01382	down	------
230	Zm00001d053358	F-box/kelch-repeat protein	1.08309	0.0461779	up	------		230	Zm00001d029648	copalyl diphosphate synthase2	-1.59772	0.0357652	down	Diterpenoid biosynthesis
231	Zm00001d016274	Monosaccharide-sensing protein 2	1.0825	1.71815e-05	up	------		231	Zm00001d015201	Protein NLP6	-1.59809	0.0448598	down	------
232	Zm00001d020610	------	1.08123	0.0329314	up	------		232	Zm00001d015292	Endoglucanase 11	-1.60211	0.00558033	down	------
233	Zm00001d010207	Pentatricopeptide repeat-containing protein	1.08118	0.0043783	up	------		233	Zm00001d009936	Basic endochitinase A	-1.60349	3.11921e-09	down	Amino sugar and nucleotide sugar metabolism;MAPK signaling pathway - plant
234	Zm00001d024423	DNA polymerase like1	1.08065	2.21756e-05	up	Purine metabolism;Nucleotide excision repair;Pyrimidine metabolism;Base excision repair;DNA replication;Homologous recombination		234	Zm00001d050834	Putative homeobox DNA-binding and leucine zipper domain family protein	-1.61061	0.0052558	down	------
235	Zm00001d052316	Ferritin-1%2C chloroplastic	1.07561	0.0158857	up	------		235	ZeamMr002	rrn2626S ribosomal RNA	-1.61282	0.0132877	down	------
236	Zm00001d002545	Protein REVEILLE 1	1.07363	0.0409174	up	------		236	Zm00001d016806	UDP-glucuronate:xylan alpha-glucuronosyltransferase 1	-1.61878	0.000353128	down	------
237	Zm00001d045949	------	1.06701	0.0434573	up	RNA degradation		237	Zm00001d002844	LIM domain-containing protein PLIM2b	-1.62181	0.000115312	down	------
238	Zm00001d049161	11-beta-hydroxysteroid dehydrogenase-like 5	1.06598	0.000155757	up	------		238	ZemaCp048	psbB	-1.62376	0.0103095	down	Photosynthesis
239	Zm00001d040627	Sodium transporter HKT1	1.06425	0.000941087	up	------		239	ENSRNA049478177	Eukaryotic small subunit ribosomal RNA	-1.62479	4.76287e-06	down	------
240	Zm00001d005889	abscisic acid 8'-hydroxylase5	1.06279	0.0020193	up	Carotenoid biosynthesis		240	Zm00001d026399	UDP-glucuronic acid decarboxylase 5	-1.62845	0.0399177	down	Amino sugar and nucleotide sugar metabolism
241	Zm00001d006553	BTB/POZ domain-containing protein	1.05951	0.00133545	up	------		241	Zm00001d027733	------	-1.6409	0.0446973	down	------
242	Zm00001d022247	calcium ion binding	1.05821	0.0122656	up	------		242	Zm00001d004375	------	-1.64396	0.0179241	down	------
243	Zm00001d003659	Serine/threonine-protein kinase SRK2A	1.03895	0.0183729	up	MAPK signaling pathway - plant;Plant hormone signal transduction		243	Zm00001d044421	sugars will eventually be exported transporter6a	-1.64861	0.0150023	down	------
244	Zm00001d016719	U-box domain-containing protein 29	1.03626	5.79574e-07	up	------		244	Zm00001d017380	Membrane steroid-binding protein 1	-1.65465	0.0129598	down	------
245	Zm00001d031531	------	1.03484	0.045875	up	------		245	Zm00001d043443	Mannan endo-14-beta-mannosidase 2	-1.66686	0.00140648	down	Fructose and mannose metabolism
246	Zm00001d045576	WAT1-related protein	1.02614	0.00035879	up	------		246	Zm00001d037515	------	-1.66813	1.38e-05	down	------
247	Zm00001d005356	Nuclear pore complex protein GP210	1.02062	0.0108487	up	RNA transport		247	Zm00001d052963	------	-1.66896	0.00172542	down	------
248	Zm00001d022144	3-oxoacyl-[acyl-carrier-protein] synthase II chloroplastic	1.01607	3.41786e-07	up	Fatty acid biosynthesis;Biotin metabolism		248	Zm00001d001616	------	-1.67255	0.0194143	down	------
249	Zm00001d014178	Acylamino-acid-releasing enzyme	1.01504	0.000645176	up	------		249	Zm00001d004401	Germin-like protein subfamily 1 member 8	-1.67625	0.0271612	down	------
250	Zm00001d005837	Zinc finger protein 8	1.01374	0.0492605	up	------		250	Zm00001d014530	Phenolic glucoside malonyltransferase 1	-1.69669	0.000283878	down	------
251	Zm00001d014451	Glutamate receptor 3.4	1.00936	0.0344998	up	------		251	Zm00001d001302	------	-1.7009	0.00136943	down	------
252	Zm00001d018696	SKU5 similar 17	1.00812	0.0473567	up	------		252	Zm00001d043221	------	-1.70447	0.0207501	down	------
253	Zm00001d027601	cytochrome P450 family 96 subfamily A polypeptide 1	1.00414	0.0104617	up	------		253	Zm00001d042934	Zinc finger%2C C2H2 type family protein	-1.70915	0.0315811	down	------
								254	ENSRNA049479595	Eukaryotic large subunit ribosomal RNA	-1.71415	0.00678276	down	------
								255	Zm00001d007462	tyrosine aminotransferase homolog1	-1.72796	0.00324305	down	Cysteine and methionine metabolism;Ubiquinone and other terpenoid-quinone biosynthesis;Isoquinoline alkaloid biosynthesis;Phenylalanine metabolism;Tyrosine metabolism;Tropane, piperidine and pyridine alkaloid biosynthesis;Phenylalanine, tyrosine and tryptophan biosynthesis
								256	Zm00001d010662	SNF1-related protein kinase regulatory subunit beta-1	-1.73614	0.0172701	down	------
								257	Zm00001d042664	Patellin-1	-1.7388	0.00230885	down	------
								258	ENSRNA049478956	Eukaryotic small subunit ribosomal RNA	-1.74038	0.0217611	down	------
								259	Zm00001d010828	alpha/beta-Hydrolases superfamily protein	-1.74146	0.0126022	down	------
								260	Zm00001d042202	Protein indeterminate-domain 11	-1.74174	0.0100007	down	------
								261	Zm00001d029696	Glutathione S-transferase U16	-1.7443	8.04049e-07	down	Glutathione metabolism
								262	ENSRNA049478576	Eukaryotic small subunit ribosomal RNA	-1.74737	0.00461245	down	------
								263	Zm00001d023496	------	-1.75197	0.00410328	down	------
								264	Zm00001d052238	------	-1.75579	0.0425298	down	------
								265	Zm00001d000952	------	-1.76498	0.000113191	down	------
								266	Zm00001d034197	------	-1.77528	0.00376359	down	------
								267	Zm00001d000951	------	-1.77611	0.000211564	down	------
								268	Zm00001d040837	Glutaredoxin-C13	-1.7796	0.00899571	down	------
								269	ENSRNA049478700	Eukaryotic small subunit ribosomal RNA	-1.78212	0.00255418	down	------
								270	Zm00001d032947	Chitinase 1	-1.78417	0.000170263	down	------
								271	Zm00001d010671	Probable glucan endo-13-beta-glucosidase BG1	-1.78467	0.000340563	down	------
								272	Zm00001d041472	NAC domain-containing protein 21/22	-1.79252	0.000532902	down	------
								273	Zm00001d008273	Alpha-xylosidase 1	-1.79807	8.52344e-05	down	------
								274	Zm00001d031666	Probable aldo-keto reductase 4	-1.80096	0.000830064	down	------
								275	Zm00001d040702	guaiacol peroxidase1	-1.80244	0.000689462	down	Phenylpropanoid biosynthesis
								276	Zm00001d005392	Lecithin-cholesterol acyltransferase-like 1	-1.8073	0.0278709	down	Glycerophospholipid metabolism
								277	Zm00001d049096	------	-1.81004	0.0164732	down	------
								278	ENSRNA049478806	Eukaryotic small subunit ribosomal RNA	-1.8142	0.0034548	down	------
								279	Zm00001d046342	kaurene oxidase2	-1.82241	0.0104644	down	Diterpenoid biosynthesis
								280	ENSRNA049478144	Eukaryotic small subunit ribosomal RNA	-1.82546	6.42835e-08	down	------
								281	Zm00001d035646	Putative DUF26 domain family protein	-1.82719	0.00334062	down	------
								282	Zm00001d020251	------	-1.82732	0.0291107	down	------
								283	Zm00001d014134	Ent-cassadiene C2-hydroxylase	-1.82755	0.0211383	down	------
								284	Zm00001d008853	Putative HLH DNA-binding domain superfamily protein	-1.82788	0.00784372	down	------
								285	Zm00001d028750	asparagine synthetase3	-1.82935	5.2304e-05	down	Alanine, aspartate and glutamate metabolism
								286	ENSRNA049479084	Eukaryotic small subunit ribosomal RNA	-1.82972	0.00269113	down	------
								287	Zm00001d001321	------	-1.82996	7.4086e-05	down	------
								288	Zm00001d011080	Protease inhibitor%3B Proteinase inhibitor	-1.83027	4.8313e-12	down	------
								289	Zm00001d012477	Laccase-13	-1.83222	0.00683577	down	------
								290	Zm00001d049438	Germin-like protein subfamily 1 member 8	-1.83231	0.00664959	down	------
								291	ENSRNA049475322	Eukaryotic small subunit ribosomal RNA	-1.83849	0.0150364	down	------
								292	Zm00001d035457	Trihelix transcription factor GT-3b	-1.85849	0.025572	down	------
								293	Zm00001d031192	------	-1.86633	0.0243436	down	------
								294	Zm00001d013647	Dehydrin 13	-1.87052	0.00518917	down	------
								295	Zm00001d023774	Erg28 like protein	-1.87127	0.000891227	down	------
								296	Zm00001d028816	Pathogenesis-related protein 10	-1.87789	4.03547e-05	down	------
								297	Zm00001d034068	UDP-glycosyltransferase 83A1	-1.87826	0.0327385	down	------
								298	ENSRNA049478590	Eukaryotic small subunit ribosomal RNA	-1.87861	0.0317461	down	------
								299	ENSRNA049478201	Eukaryotic small subunit ribosomal RNA	-1.88362	0.000273838	down	------
								300	Zm00001d041826	protein; Protein kinase domain containing protein	-1.88481	0.0161195	down	------
								301	Zm00001d039795	Probable carboxylesterase 15	-1.89092	3.12421e-05	down	------
								302	ENSRNA049477401	Eukaryotic small subunit ribosomal RNA	-1.8947	0.00237142	down	------
								303	Zm00001d008756	HXXXD-type acyl-transferase family protein	-1.89717	0.00803667	down	------
								304	Zm00001d007187	hydroxyproline-rich glycoprotein family protein	-1.89902	0.00514831	down	------
								305	Zm00001d003191	Endochitinase EP3	-1.8996	0.0221391	down	Amino sugar and nucleotide sugar metabolism
								306	Zm00001d030548	2-oxoglutarate (2OG) and Fe(II)-dependent oxygenase superfamily protein	-1.90042	0.00319408	down	------
								307	Zm00001d042270	Heavy metal transport/detoxification superfamily protein	-1.90348	0.000780083	down	------
								308	Zm00001d001299	------	-1.9118	0.000230014	down	------
								309	Zm00001d014074	CCT motif family protein	-1.91908	0.00417434	down	------
								310	Zm00001d000983	------	-1.9235	0.000232508	down	------
								311	Zm00001d014583	Protein kinase superfamily protein	-1.92715	0.00230414	down	------
								312	Zm00001d034643	Actin-depolymerizing factor 10	-1.94936	0.000116581	down	------
								313	Zm00001d048087	Flavone 3'-O-methyltransferase 1	-1.94942	0.0195491	down	Phenylpropanoid biosynthesis
								314	Zm00001d046134	Glycosyl hydrolase superfamily protein	-1.95176	0.0428575	down	------
								315	Zm00001d020008	Indole-3-glycerol phosphate synthase chloroplastic	-1.95267	0.0114351	down	Phenylalanine, tyrosine and tryptophan biosynthesis
								316	Zm00001d044904	Transcription factor EMB1444	-1.9566	0.00827201	down	------
								317	Zm00001d052390	Arabidopsis NAC domain containing protein 87	-1.95835	0.000506531	down	------
								318	Zm00001d047342	------	-1.9639	0.0163647	down	------
								319	Zm00001d040245	Putative serine type endopeptidase inhibitor	-1.96604	0.00597967	down	------
								320	Zm00001d039520	cytokinin oxidase1	-1.97566	0.0027354	down	Zeatin biosynthesis
								321	Zm00001d027949	Tyrosine/DOPA decarboxylase 2	-1.98411	0.000925423	down	Isoquinoline alkaloid biosynthesis;Tyrosine metabolism
								322	Zm00001d052189	Putative RING zinc finger domain superfamily protein	-1.9915	0.00777223	down	------
								323	ENSRNA049478628	5.8S ribosomal RNA	-2.01771	0.0143014	down	------
								324	Zm00001d023625	Putative cytochrome P450 superfamily protein	-2.02025	0.00215907	down	------
								325	Zm00001d043344	glutathione transferase8	-2.04837	0.00252597	down	Glutathione metabolism
								326	Zm00001d034986	Cytochrome P450 71A26	-2.05555	0.00265144	down	------
								327	Zm00001d006231	PLC-like phosphodiesterases superfamily protein	-2.06423	0.0431558	down	------
								328	Zm00001d045884	ADPATP carrier protein 1 mitochondrial	-2.07037	0.000300125	down	------
								329	Zm00001d018716	Galactoside 2-alpha-L-fucosyltransferase	-2.08629	0.0374942	down	------
								330	Zm00001d025393	Putative S-locus receptor-like protein kinase family protein	-2.09022	0.0213929	down	------
								331	Zm00001d018701	Galactoside 2-alpha-L-fucosyltransferase	-2.10575	0.000115498	down	------
								332	Zm00001d007714	Probable glycerol-3-phosphate acyltransferase 2	-2.10828	0.038172	down	Glycerophospholipid metabolism;Glycerolipid metabolism
								333	Zm00001d045361	------	-2.10933	0.00309928	down	------
								334	Zm00001d038870	Late embryogenesis abundant protein%2C group 3	-2.11146	0.000226545	down	------
								335	Zm00001d003657	Protein SCARECROW	-2.11976	0.0215659	down	------
								336	Zm00001d034956	ARM repeat superfamily protein	-2.12414	0.029887	down	------
								337	Zm00001d022467	Anthocyanidin 3-O-glucosyltransferase	-2.13345	0.0316022	down	------
								338	Zm00001d043453	Early nodulin-like protein 3	-2.14798	0.000162442	down	------
								339	Zm00001d028198	------	-2.16137	0.00568786	down	------
								340	Zm00001d017381	(+)-neomenthol dehydrogenase	-2.17517	0.0234361	down	Monoterpenoid biosynthesis
								341	Zm00001d018773	Transcription factor JUNGBRUNNEN 1	-2.18005	0.00840056	down	------
								342	Zm00001d020702	Mitochondrial phosphate carrier protein 2 mitochondrial	-2.18126	0.0454466	down	------
								343	Zm00001d020982	NAC domain containing protein 38	-2.18313	0.0144943	down	------
								344	Zm00001d039375	RING-H2 finger protein ATL3	-2.18487	0.0123675	down	------
								345	ENSRNA049478584	Eukaryotic small subunit ribosomal RNA	-2.18874	0.00395165	down	------
								346	Zm00001d007831	Bifunctional inhibitor/lipid-transfer protein/seed storage 2S albumin superfamily protein	-2.1892	1.86476e-06	down	------
								347	Zm00001d034096	cytochrome P450 family 81 subfamily D polypeptide 8	-2.19098	0.00239979	down	------
								348	ENSRNA049478949	Eukaryotic small subunit ribosomal RNA	-2.19341	0.00508544	down	------
								349	Zm00001d033782	Seed maturation protein PM41	-2.19388	0.0203127	down	------
								350	Zm00001d047402	Putative calmodulin-binding family protein	-2.19924	0.0323337	down	------
								351	Zm00001d006947	Cytochrome P450 CYP709C14	-2.20149	0.0134559	down	------
								352	Zm00001d014667	DUF4228 domain protein	-2.20818	0.00163991	down	------
								353	Zm00001d022210	------	-2.22072	0.0488571	down	------
								354	ZeamMp086	nad7	-2.22863	0.0404612	down	Oxidative phosphorylation
								355	Zm00001d018681	------	-2.23113	0.00358909	down	------
								356	ENSRNA049478131	Eukaryotic small subunit ribosomal RNA	-2.23316	0.0148663	down	------
								357	Zm00001d024946	flavone synthase typeII1	-2.27159	0.00682278	down	------
								358	Zm00001d028588	Fes1B	-2.27404	0.0195096	down	Protein processing in endoplasmic reticulum
								359	Zm00001d007285	NADP-dependent alkenal double bond reductase P2	-2.27557	0.0301254	down	------
								360	ENSRNA049478138	Eukaryotic small subunit ribosomal RNA	-2.27563	2.67961e-06	down	------
								361	Zm00001d034277	Transcription factor JUNGBRUNNEN 1	-2.28095	0.0364111	down	------
								362	Zm00001d039936	17.4 kDa class I heat shock protein	-2.28419	0.015226	down	Protein processing in endoplasmic reticulum
								363	Zm00001d016947	------	-2.28449	0.0106802	down	------
								364	Zm00001d044352	------	-2.29799	0.0366477	down	------
								365	Zm00001d018203	Probable WRKY transcription factor 9	-2.33594	0.0001131	down	------
								366	Zm00001d002295	Germin-like protein subfamily 1 member 11	-2.3381	0.00362694	down	------
								367	Zm00001d007753	Eukaryotic aspartyl protease family protein	-2.35934	0.0492512	down	------
								368	Zm00001d016948	------	-2.38211	0.0137558	down	------
								369	Zm00001d008255	Yucca6	-2.38284	0.00169805	down	Tryptophan metabolism
								370	Zm00001d024414	Seed maturation protein	-2.385	0.0109655	down	------
								371	Zm00001d015845	bZIP transcription factor family protein	-2.3916	0.0352418	down	Plant hormone signal transduction
								372	Zm00001d002970	silkless ears1	-2.40013	0.0206623	down	------
								373	Zm00001d025753	chitinase B1	-2.41191	0.00476845	down	Amino sugar and nucleotide sugar metabolism
								374	Zm00001d012292	Glucan endo-13-beta-glucosidase 14	-2.41873	0.00931556	down	------
								375	ENSRNA049478703	Eukaryotic small subunit ribosomal RNA	-2.43635	0.0094942	down	------
								376	Zm00001d011315	ABC transporter G family member 40	-2.44129	0.032214	down	------
								377	Zm00001d006526	Eukaryotic aspartyl protease family protein	-2.44198	0.00912815	down	------
								378	Zm00001d025200	Putative cytochrome P450 superfamily protein	-2.4492	4.30109e-10	down	------
								379	Zm00001d047192	5-pentadecatrienyl resorcinol O-methyltransferase	-2.47386	0.00167793	down	Stilbenoid, diarylheptanoid and gingerol biosynthesis
								380	Zm00001d048020	hemoglobin1	-2.49733	2.76379e-05	down	------
								381	Zm00001d034848	Cytochrome P450 71B10	-2.50024	0.000332028	down	Cyanoamino acid metabolism
								382	ENSRNA049478292	5.8S ribosomal RNA	-2.50211	0.0365132	down	------
								383	Zm00001d003494	------	-2.50994	0.000636571	down	------
								384	Zm00001d024211	Alpha-humulene/(-)-(E)-beta-caryophyllene synthase	-2.5126	0.00575498	down	Sesquiterpenoid and triterpenoid biosynthesis
								385	Zm00001d048560	Glutathione S-transferase U16	-2.51606	0.0133956	down	Glutathione metabolism
								386	Zm00001d000233	Cation/H(+) antiporter 19	-2.51714	0.00200907	down	------
								387	ENSRNA049478482	Eukaryotic small subunit ribosomal RNA	-2.52285	1.65096e-17	down	------
								388	Zm00001d045862	UDP-glycosyltransferase 72B1	-2.52434	0.00930052	down	------
								389	Zm00001d049435	Germin-like protein subfamily 1 member 8	-2.52692	0.0391359	down	------
								390	Zm00001d010232	Zea mays MADS29	-2.53624	0.0470167	down	------
								391	Zm00001d016476	Eukaryotic aspartyl protease family protein	-2.54139	0.0108897	down	------
								392	Zm00001d003190	Endochitinase A	-2.55517	0.00157916	down	Amino sugar and nucleotide sugar metabolism
								393	Zm00001d044022	seed maturation protein PM41	-2.56593	0.0256532	down	------
								394	Zm00001d024210	terpene synthase6	-2.59065	0.0156601	down	Sesquiterpenoid and triterpenoid biosynthesis
								395	Zm00001d013907	Nonspecific lipid-transfer protein	-2.5917	0.0248277	down	------
								396	Zm00001d009687	Plant basic secretory protein (BSP) family protein	-2.59401	0.0215096	down	------
								397	Zm00001d049423	Germin-like protein subfamily 1 member 8	-2.60353	0.0327388	down	------
								398	Zm00001d037894	Dehydrin DHN1	-2.61491	4.64793e-06	down	------
								399	Zm00001d001832	NDR1/HIN1-like 25	-2.62477	3.7714e-07	down	------
								400	Zm00001d027710	Peroxidase 60	-2.6276	0.0446894	down	Phenylpropanoid biosynthesis
								401	Zm00001d043651	Tryptophan aminotransferase-related protein 4	-2.6363	0.0315817	down	------
								402	Zm00001d049957	kaurene synthase6	-2.6485	0.0272568	down	Diterpenoid biosynthesis
								403	Zm00001d038151	------	-2.65456	0.0210786	down	------
								404	ENSRNA049478963	Eukaryotic small subunit ribosomal RNA	-2.66367	0.00197611	down	------
								405	Zm00001d011393	S-type anion channel SLAH3	-2.66771	0.00710013	down	------
								406	Zm00001d044629	Meiotic recombination protein DMC1 homolog	-2.67588	0.0133346	down	------
								407	Zm00001d003301	C2 and GRAM domain-containing protein	-2.67682	0.000875378	down	------
								408	Zm00001d028718	Hydrophobic protein RCI2B	-2.69079	0.0301229	down	------
								409	Zm00001d014341	Peroxidase 53	-2.69356	0.000201975	down	Phenylpropanoid biosynthesis
								410	Zm00001d021140	Aleurone layer morphogenesis protein; protein	-2.70525	0.0134909	down	------
								411	ENSRNA049478147	Eukaryotic small subunit ribosomal RNA	-2.72142	5.40035e-06	down	------
								412	Zm00001d022222	------	-2.73555	0.00775812	down	------
								413	Zm00001d022191	VQ motif-containing protein	-2.75383	2.72536e-05	down	------
								414	Zm00001d001960	Naringenin2-oxoglutarate 3-dioxygenase	-2.76405	6.64113e-05	down	Flavonoid biosynthesis
								415	Zm00001d008131	------	-2.76675	0.0254076	down	------
								416	Zm00001d024207	Alpha-humulene/(-)-(E)-beta-caryophyllene synthase	-2.77621	0.0330515	down	Sesquiterpenoid and triterpenoid biosynthesis
								417	Zm00001d015894	------	-2.78011	0.037137	down	------
								418	ENSRNA049477412	5.8S ribosomal RNA	-2.78103	0.00395307	down	------
								419	Zm00001d000327	Cysteine protease 1	-2.7961	0.0297527	down	------
								420	Zm00001d017619	uncharacterized protein [Source:UniProtKB/TrEMBL;Acc:B6U6D2]	-2.8029	0.031432	down	------
								421	ENSRNA049478136	Eukaryotic small subunit ribosomal RNA	-2.82251	0.00375086	down	------
								422	Zm00001d024996	Bowman-Birk type trypsin inhibitor	-2.83452	0.00338658	down	------
								423	ENSRNA049478282	5.8S ribosomal RNA	-2.85866	0.0135084	down	------
								424	Zm00001d035178	Cytochrome P450 71A26	-2.87436	1.21172e-06	down	------
								425	Zm00001d024960	Bowman-Birk type trypsin inhibitor	-2.87699	0.000180905	down	------
								426	ENSRNA049479889	Eukaryotic small subunit ribosomal RNA	-2.88385	2.14768e-06	down	------
								427	Zm00001d003274	OSJNBb0011N17.11 protein	-2.89487	0.00421899	down	------
								428	Zm00001d018393	Protein binding protein	-2.91768	0.00266521	down	------
								429	Zm00001d007411	NADH-ubiquinone reductase complex 1 MLRQ subunit	-2.95007	0.000580097	down	------
								430	Zm00001d034126	------	-2.96901	0.0398565	down	------
								431	Zm00001d000012	Germin-like protein subfamily 1 member 8	-3.00908	0.0212594	down	------
								432	Zm00001d006796	NAD(P)-binding Rossmann-fold superfamily protein	-3.01438	0.00641794	down	------
								433	Zm00001d029798	------	-3.05939	0.0491775	down	------
								434	Zm00001d013849	Trihelix transcription factor GT-2	-3.06619	0.00509652	down	------
								435	ENSRNA049478600	Eukaryotic small subunit ribosomal RNA	-3.08953	0.00701079	down	------
								436	Zm00001d040443	------	-3.16997	0.0241383	down	------
								437	Zm00001d052906	Putative lectin-domain receptor-like protein kinase family protein	-3.21323	0.033804	down	------
								438	Zm00001d023170	------	-3.2297	0.0497231	down	------
								439	Zm00001d036164	Salicylate/benzoate carboxyl methyltransferase	-3.24147	0.00513766	down	------
								440	Zm00001d014335	cytochrome P450 family 87 subfamily A polypeptide 6	-3.25314	6.58708e-05	down	------
								441	Zm00001d024943	Putative cytochrome P450 superfamily protein	-3.26146	2.08908e-05	down	------
								442	Zm00001d001976	Protein NRT1/ PTR FAMILY 2.13	-3.27662	0.0207445	down	------
								443	Zm00001d025390	receptor-like protein kinase 4	-3.28256	0.0222719	down	------
								444	Zm00001d038667	Protein BREAST CANCER SUSCEPTIBILITY 1 homolog	-3.30071	0.0244989	down	Homologous recombination
								445	ENSRNA049479040	Eukaryotic large subunit ribosomal RNA	-3.30437	0.0168497	down	------
								446	Zm00001d011778	tonoplast intrinsic protein1	-3.30733	0.000105126	down	------
								447	Zm00001d051205	PAN domain-containing protein	-3.38162	0.0379123	down	------
								448	Zm00001d007781	(Z)-3-hexen-1-ol acetyltransferase	-3.39118	0.000930125	down	------
								449	Zm00001d049420	Germin-like protein subfamily 1 member 8	-3.43929	0.0219801	down	------
								450	Zm00001d012430	Zinc finger protein ZAT11	-3.44361	8.34524e-05	down	------
								451	Zm00001d009296	Pathogenesis-related protein PRMS	-3.4487	7.19591e-05	down	MAPK signaling pathway - plant;Plant-pathogen interaction;Plant hormone signal transduction
								452	ENSRNA049479090	Eukaryotic small subunit ribosomal RNA	-3.48426	0.00148196	down	------
								453	Zm00001d031131	K-exchanger-like protein	-3.52651	0.000132734	down	------
								454	Zm00001d050936	------	-3.57754	0.00874688	down	------
								455	Zm00001d000017	Germin-like protein	-3.723	0.0040504	down	------
								456	Zm00001d034310	Probable L-gulonolactone oxidase 6	-3.74909	0.0229827	down	------
								457	Zm00001d034184	allene oxide synthesis4	-3.75228	0.000946303	down	alpha-Linolenic acid metabolism
								458	Zm00001d003903	Protein TIFY 9	-3.76845	0.0479709	down	Plant hormone signal transduction
								459	Zm00001d021461	Cation/H(+) antiporter 1	-3.77789	0.00286835	down	------
								460	Zm00001d011259	Aldehyde dehydrogenase family 2 member C4	-3.82322	0.000840297	down	Phenylpropanoid biosynthesis
								461	Zm00001d029359	benzoxazinone synthesis10	-3.8669	0.0101745	down	Stilbenoid, diarylheptanoid and gingerol biosynthesis
								462	Zm00001d034097	cytochrome P450 family 81 subfamily D polypeptide 8	-3.86756	6.58598e-06	down	------
								463	ZeamMp084	orf191	-3.92328	0.042001	down	------
								464	Zm00001d004847	rRNA N-glycosidase	-3.93439	0.040417	down	------
								465	Zm00001d043350	Probable indole-3-acetic acid-amido synthetase GH3.1	-3.96573	0.0024748	down	Plant hormone signal transduction
								466	Zm00001d016128	------	-3.98386	0.00358421	down	------
								467	Zm00001d043419	------	-4.01422	0.0342222	down	------
								468	Zm00001d022566	------	-4.07743	0.00979112	down	------
								469	Zm00001d038070	------	-4.10199	0.00504084	down	------
								470	ENSRNA049464954	U5 spliceosomal RNA	-4.11545	0.0204508	down	------
								471	Zm00001d014615	xyloglucan endotransglycosylase homolog1	-4.20129	2.73776e-05	down	------
								472	Zm00001d054010	------	-4.29976	1.99728e-05	down	------
								473	Zm00001d023288	------	-4.33558	0.0372989	down	------
								474	Zm00001d013099	Probable carboxylesterase 15	-4.38707	7.37599e-06	down	------
								475	Zm00001d031778	Carbonic anhydrase	-4.40567	4.89966e-06	down	Nitrogen metabolism
								476	Zm00001d020805	------	-4.46038	0.0436608	down	------
								477	Zm00001d033514	Cytosolic sulfotransferase 17	-4.46847	0.0438344	down	------
								478	Zm00001d016195	RNA binding (RRM/RBD/RNP motifs) family protein	-4.48334	0.0427058	down	------
								479	Zm00001d040485	Light-mediated development protein DET1	-4.53722	0.0465352	down	Ubiquitin mediated proteolysis
								480	Zm00001d048719	Glutaredoxin-C13	-4.56727	0.0327975	down	------
								481	Zm00001d030437	Duplicated homeodomain-like superfamily protein	-4.58871	0.0427384	down	N-Glycan biosynthesis
								482	Zm00001d022291	Putative 1-phosphatidylinositol-3-phosphate 5-kinase FAB1D	-4.60289	0.0360886	down	Phagosome;Phosphatidylinositol signaling system;Inositol phosphate metabolism
								483	Zm00001d032005	------	-4.60932	0.0177006	down	------
								484	Zm00001d014282	------	-4.74462	0.0452893	down	------
								485	Zm00001d008325	FPF1	-4.76941	0.0189434	down	------
								486	Zm00001d006237	Protein POLLENLESS 3-LIKE 2	-4.79673	0.0414381	down	------
								487	Zm00001d006646	------	-4.84164	0.0492849	down	------
								488	Zm00001d005296	late embryogenesis abundant protein	-4.8446	0.014583	down	------
								489	Zm00001d052784	FAD/NAD(P)-binding oxidoreductase family protein	-4.91364	0.0142019	down	------
								490	Zm00001d020418	Cytokinin hydroxylase	-4.95324	0.0306569	down	Zeatin biosynthesis
								491	Zm00001d049421	Germin-like protein subfamily 1 member 8	-4.95435	0.0082507	down	------
								492	ZemaCp047	clpP	-4.99327	0.0300168	down	------
								493	Zm00001d043190	------	-5.03554	0.0117043	down	------
								494	Zm00001d044147	cytochrome P450 family 72 subfamily A polypeptide 8	-5.05518	0.0249088	down	------
								495	Zm00001d028001	------	-5.1024	0.0105792	down	------
								496	Zm00001d014111	hAT transposon superfamily protein	-5.1521	0.00651874	down	------
								497	ENSRNA049462609	Small nucleolar RNA R160	-5.17122	0.00510068	down	------
								498	Zm00001d049427	Germin-like protein subfamily 1 member 8	-5.21093	0.00406139	down	------
								499	Zm00001d047194	5-pentadecatrienyl resorcinol O-methyltransferase	-5.24048	0.00576219	down	Stilbenoid, diarylheptanoid and gingerol biosynthesis
								500	Zm00001d017851	------	-5.39021	0.0130049	down	------
								501	Zm00001d035261	Peptide chain release factor PrfB1 chloroplastic	-5.44525	0.0131717	down	------
								502	Zm00001d051695	Aspartyl protease AED1	-5.4921	0.0299198	down	------
								503	ZeamMp011	orf342	-5.55335	0.00019435	down	------
								504	ZemaCp096	trnAtRNA-Ala	-5.56549	0.0080315	down	------
								505	Zm00001d042292	SAUR-like auxin-responsive protein family	-5.7119	0.00122732	down	Plant hormone signal transduction
								506	Zm00001d020938	bZIP transcription factor family protein	-5.86194	0.0028933	down	Plant hormone signal transduction
								507	Zm00001d024751	Peroxidase 64	-7.83374	0.0451006	down	Phenylpropanoid biosynthesis
								508	ENSRNA049465879	Eukaryotic small subunit ribosomal RNA	-9.16895	0.0189626	down	------

## Sheet: Sheet 2 - Region II
No.	Gene ID1	Description2	Log2FC3	p Value4	Expr.5	KEGG Pathway6		No.	Gene ID1	Description2	Log2FC3	p Value4	Expr.5	KEGG Pathway6
1	Zm00001d039434	Agamous-like MADS-box protein AGL5	1.75641	2.85562e-16	up	------		1	Zm00001d023699	glycine cleavage system protein H1	-1.32775	2.02394e-17	down	Glyoxylate and dicarboxylate metabolism;Glycine, serine and threonine metabolism
2	Zm00001d039176	Protein kinase protein with adenine nucleotide alpha hydrolases-like domain	1.82409	3.56797e-14	up	------		2	Zm00001d023713	Photosystem I reaction center subunit N	-1.16507	1.39436e-09	down	Photosynthesis
3	Zm00001d018161	nitrite reductase2	2.65752	4.98578e-14	up	Nitrogen metabolism		3	Zm00001d019358	B12D protein	-1.18829	1.88437e-09	down	------
4	Zm00001d039422	phosphoribosylaminoimidazole carboxylase family protein / AIR carboxylase family protein	1.10948	5.05695e-13	up	Purine metabolism		4	Zm00001d038764	UDP-glycosyltransferase 88A1	-1.03731	2.13934e-09	down	------
5	Zm00001d014292	Inositol-3-phosphate synthase isozyme 1	1.0325	1.94371e-12	up	Inositol phosphate metabolism		5	Zm00001d020170	Sulfite exporter TauE/SafE family protein	-1.41095	4.18404e-09	down	------
6	Zm00001d025875	------	1.84344	3.52376e-11	up	------		6	Zm00001d007533	disease resistance protein (TIR-NBS class)	-2.45091	8.29972e-09	down	------
7	Zm00001d022628	R2R3MYB-domain protein	2.25065	2.55279e-10	up	------		7	Zm00001d002302	Auxin responsive protein	-1.38997	4.83674e-08	down	------
8	Zm00001d024936	Fatty acid amide hydrolase	1.24675	9.39478e-09	up	------		8	Zm00001d021885	triose phosphate isomerase1	-1.08467	6.19789e-07	down	------
9	Zm00001d004162	------	1.16631	1.16716e-08	up	------		9	Zm00001d015306	Probable arabinose 5-phosphate isomerase	-1.13767	7.17351e-07	down	------
10	Zm00001d004342	Natterin-4	1.71625	2.48643e-08	up	------		10	Zm00001d011207	------	-5.43249	7.18753e-07	down	------
11	Zm00001d014704	------	1.03792	3.38348e-08	up	------		11	Zm00001d025116	Methylesterase 3	-1.11297	1.01881e-06	down	Indole alkaloid biosynthesis
12	Zm00001d001811	Tetraspanin-19	1.18524	8.60142e-08	up	------		12	Zm00001d035581	------	-1.19191	1.30592e-06	down	------
13	Zm00001d050323	Putative cytochrome P450 superfamily protein	1.00671	2.06619e-07	up	------		13	Zm00001d013612	Tubulin beta-4 chain	-1.1229	1.7107e-06	down	Phagosome
14	Zm00001d045322	Ubiquinone biosynthesis O-methyltransferase mitochondrial	1.06666	2.17634e-07	up	Ubiquinone and other terpenoid-quinone biosynthesis		14	Zm00001d033062	Transparent testa 12 protein	-1.38907	2.83913e-06	down	------
15	Zm00001d014674	UDP-sugar pyrophosphorylase	1.09634	6.4224e-07	up	Pentose and glucuronate interconversions;Galactose metabolism;Ascorbate and aldarate metabolism;Amino sugar and nucleotide sugar metabolism		15	Zm00001d022600	Eukaryotic aspartyl protease family protein	-1.0497	4.32424e-06	down	------
16	Zm00001d023395	Stress-response A/B barrel domain-containing protein	1.00155	7.38761e-07	up	------		16	Zm00001d022449	Potassium transporter 2	-1.49502	8.0382e-06	down	------
17	Zm00001d015591	------	6.77417	4.14094e-06	up	------		17	Zm00001d039427	Protein kinase superfamily protein	-1.5265	8.37888e-06	down	------
18	Zm00001d000804	------	1.645	1.15689e-05	up	------		18	Zm00001d048434	Type IV inositol polyphosphate 5-phosphatase 7	-1.31369	1.15248e-05	down	------
19	Zm00001d015578	Cytochrome P450 71D8	1.50971	1.24556e-05	up	------		19	Zm00001d026238	Protein TRANSPARENT TESTA 12	-1.59001	1.28058e-05	down	------
20	Zm00001d045377	------	8.99474	1.87031e-05	up	------		20	Zm00001d025571	------	-1.05928	1.83587e-05	down	------
21	Zm00001d014718	Thylakoid lumenal 16.5 kDa protein chloroplastic	1.53748	2.1447e-05	up	------		21	Zm00001d013228	TIP41-like family protein	-1.07275	3.65309e-05	down	------
22	Zm00001d049006	PHD finger protein ALFIN-LIKE 6	6.59335	2.35964e-05	up	------		22	Zm00001d052090	Putative DUF1618 domain containing family protein	-1.07379	6.38883e-05	down	------
23	Zm00001d035336	Peroxidase superfamily protein	6.42429	3.36393e-05	up	Phenylpropanoid biosynthesis		23	Zm00001d033079	GDSL esterase/lipase	-1.20485	8.75552e-05	down	------
24	Zm00001d024713	RNA binding (RRM/RBD/RNP motifs) family protein	1.31973	4.00885e-05	up	RNA degradation		24	Zm00001d012801	TRF-like 10	-2.88952	0.000121941	down	------
25	Zm00001d024770	14-dihydroxy-2-naphthoyl-CoA thioesterase 1	1.02397	5.31501e-05	up	------		25	Zm00001d045341	Pyridoxal-5'-phosphate-dependent enzyme family protein	-1.39969	0.000124182	down	Cysteine and methionine metabolism;Sulfur metabolism
26	Zm00001d000570	------	6.18368	5.9041e-05	up	------		26	Zm00001d023950	Glucuronoxylan 4-O-methyltransferase 2	-1.50662	0.000198907	down	------
27	Zm00001d036846	------	6.14441	6.01843e-05	up	------		27	Zm00001d023877	------	-1.03135	0.000200937	down	------
28	Zm00001d002179	F-box only protein 7	4.0407	9.00284e-05	up	------		28	Zm00001d016910	UDP-glycosyltransferase 85A7	-1.11633	0.000234986	down	Monoterpenoid biosynthesis
29	Zm00001d025397	ubiquitin interaction motif-containing protein	1.11402	9.5431e-05	up	------		29	Zm00001d036736	------	-1.2468	0.000258046	down	------
30	Zm00001d013995	Peptide-N4-(N-acetyl-beta-glucosaminyl)asparagine amidase A protein	2.3745	9.72928e-05	up	------		30	Zm00001d025480	Cysteine proteinases superfamily protein	-1.28806	0.000311355	down	------
31	Zm00001d022428	Probable galacturonosyltransferase 7	1.0512	0.000189934	up	Amino sugar and nucleotide sugar metabolism		31	Zm00001d011316	------	-8.49954	0.000392191	down	------
32	Zm00001d031516	------	1.15263	0.000228846	up	------		32	Zm00001d002271	Nitrate-induced NOI protein	-1.63641	0.0004879	down	------
33	Zm00001d038300	Putative cytochrome P450 superfamily protein	1.56844	0.000270274	up	------		33	Zm00001d037737	ZAG1 protein%3B Zea AGAMOUS-like protein	-2.32556	0.000561364	down	------
34	Zm00001d025950	Autophagy-related protein 13a	1.07929	0.000281894	up	------		34	Zm00001d029460	Ids4-like protein	-2.64698	0.000676511	down	------
35	Zm00001d026537	Putative homeobox DNA-binding domain superfamily protein%3B WUS2 protein	1.01521	0.000323367	up	------		35	Zm00001d015806	------	-1.05713	0.000729915	down	------
36	Zm00001d019269	Pentatricopeptide repeat-containing protein	1.41429	0.000515126	up	------		36	Zm00001d026191	Ethylene-responsive transcription factor 1A	-1.6844	0.0007468	down	------
37	Zm00001d013492	Ethylene-insensitive protein 2	1.16075	0.000619644	up	MAPK signaling pathway - plant;Plant hormone signal transduction		37	Zm00001d020277	Carbohydrate transporter/ sugar porter/ transporter	-1.01779	0.0007926	down	------
38	Zm00001d044765	Benzoate carboxyl methyltransferase	1.99334	0.000737258	up	------		38	Zm00001d052131	UPF0614 C14orf102-like protein	-5.71486	0.000804374	down	------
39	Zm00001d022457	peroxidase3	2.16933	0.000844375	up	Phenylpropanoid biosynthesis		39	Zm00001d015905	sugars will eventually be exported transporter4a	-1.05869	0.00101978	down	------
40	Zm00001d035569	------	1.0444	0.000938785	up	------		40	Zm00001d051091	Guanine nucleotide-binding protein subunit beta	-1.01505	0.00102545	down	Ubiquitin mediated proteolysis;Spliceosome
41	Zm00001d010037	------	5.00417	0.00108113	up	Ribosome		41	Zm00001d025395	ubiquitin interaction motif-containing protein	-1.01464	0.0013917	down	------
42	Zm00001d013527	Calcium-dependent protein kinase 30	1.10483	0.00128465	up	Plant-pathogen interaction		42	Zm00001d015877	------	-4.90914	0.00150623	down	------
43	Zm00001d001767	Speckle-type POZ protein	1.66426	0.0013497	up	------		43	Zm00001d038907	AP2/ERF and B3 domain-containing transcription repressor TEM1	-1.37013	0.00165094	down	------
44	Zm00001d030114	60S ribosomal protein L7-2	1.12899	0.00142107	up	Ribosome		44	Zm00001d046779	Glutathione synthetase chloroplastic	-2.0467	0.0021794	down	Cysteine and methionine metabolism;Glutathione metabolism
45	Zm00001d046838	Putative receptor-like protein kinase family protein	2.79752	0.00147383	up	------		45	Zm00001d000156	Vesicle-fusing ATPase	-3.10392	0.00237744	down	------
46	Zm00001d007549	Beta-carotene isomerase D27 chloroplastic	1.38907	0.00156427	up	Carotenoid biosynthesis		46	Zm00001d013378	Maf-like protein	-1.50956	0.00258808	down	------
47	Zm00001d021264	------	1.20257	0.00182145	up	------		47	Zm00001d038642	Protein SULFUR DEFICIENCY-INDUCED 1	-1.14106	0.00273939	down	------
48	Zm00001d025874	uncharacterized protein [Source:UniProtKB/TrEMBL;Acc:B6U466]	1.18511	0.00188875	up	------		48	Zm00001d001627	------	-1.13789	0.00276543	down	------
49	Zm00001d019339	Splicing factor SF3a60 homolog	1.25773	0.00222234	up	------		49	Zm00001d040770	------	-5.47379	0.00277265	down	------
50	Zm00001d009796	prefoldin 6	2.21647	0.00239173	up	------		50	Zm00001d025916	E3 ubiquitin-protein ligase RMA1	-2.33772	0.00283279	down	Protein processing in endoplasmic reticulum
51	Zm00001d047967	bZIP transcription factor 16	5.03208	0.00247763	up	------		51	Zm00001d042401	alpha/beta-Hydrolases superfamily protein	-1.96435	0.00294725	down	------
52	Zm00001d001523	------	1.75138	0.00249607	up	------		52	Zm00001d001042	------	-4.94376	0.00333407	down	------
53	Zm00001d050199	60S ribosomal protein L18a-2	1.06439	0.00256902	up	Ribosome		53	Zm00001d040240	------	-5.42139	0.00359612	down	------
54	Zm00001d001989	------	1.61028	0.00272948	up	------		54	Zm00001d002144	Protein EPIDERMAL PATTERNING FACTOR 2	-5.2213	0.00369969	down	MAPK signaling pathway - plant
55	Zm00001d034051	Vacuolar protein sorting-associated protein 41 homolog	3.29302	0.00283021	up	------		55	Zm00001d030684	Chaperone protein dnaJ 6	-5.33488	0.00381681	down	------
56	Zm00001d014446	Protein kinase superfamily protein	1.13924	0.00285621	up	------		56	Zm00001d047523	Probable WRKY transcription factor 30	-1.08282	0.00398952	down	------
57	Zm00001d025091	------	5.36228	0.00349708	up	------		57	Zm00001d051156	Putative phosphoenolpyruvate carboxylase kinase family protein	-1.16947	0.0042275	down	------
58	Zm00001d051111	DExH-box ATP-dependent RNA helicase DExH17	1.37411	0.00369233	up	------		58	Zm00001d024833	------	-1.05961	0.0048301	down	------
59	Zm00001d019412	UDP-glycosyltransferase 88A1	4.6313	0.00388769	up	------		59	Zm00001d011041	UPA23	-2.00689	0.00517678	down	------
60	Zm00001d022000	------	1.52899	0.00395611	up	------		60	Zm00001d023720	Ureide permease 5	-1.07058	0.00526865	down	------
61	Zm00001d005337	Cytidine/deoxycytidylate deaminase family protein	5.14827	0.00402919	up	------		61	Zm00001d025229	------	-5.79927	0.00536479	down	------
62	Zm00001d047358	Peroxidase K	1.04673	0.00434444	up	Phenylpropanoid biosynthesis		62	Zm00001d002186	divergent spindle1	-1.30028	0.0055703	down	------
63	Zm00001d024101	------	5.13064	0.00440605	up	Peroxisome		63	Zm00001d013454	------	-2.70545	0.00560309	down	------
64	Zm00001d020238	Protein HOTHEAD	1.48162	0.00478248	up	Cutin, suberine and wax biosynthesis		64	ZeamMp051	atp4	-2.28774	0.00560395	down	------
65	Zm00001d035234	protein; Tyrosine specific protein phosphatase-like	1.03708	0.00487992	up	------		65	Zm00001d000067	Serine--tRNA ligase cytoplasmic	-3.47945	0.00564332	down	Aminoacyl-tRNA biosynthesis
66	Zm00001d001303	------	5.12487	0.00501301	up	------		66	ZeamMp073	orf105-c	-2.1779	0.00602715	down	------
67	Zm00001d007686	Receptor-like kinase-like	1.91551	0.00531374	up	------		67	Zm00001d013900	Expressed protein; protein	-5.7438	0.00609579	down	------
68	Zm00001d045208	PIF / Ping-Pong family of plant transposases	1.10142	0.00533763	up	------		68	Zm00001d024799	------	-2.544	0.00610829	down	------
69	Zm00001d025932	Remorin	1.3351	0.00546395	up	------		69	ENSRNA049478530	Eukaryotic small subunit ribosomal RNA	-2.64242	0.00625284	down	------
70	Zm00001d046344	kaurene oxidase1	1.09978	0.00565751	up	Diterpenoid biosynthesis		70	Zm00001d048452	------	-5.0186	0.00679238	down	------
71	Zm00001d046813	Chaperone protein dnaJ 8 chloroplastic	2.21162	0.00577372	up	------		71	Zm00001d021916	Big map kinase/bmk	-1.38037	0.00707658	down	------
72	ENSRNA049470333	U1 spliceosomal RNA	3.1018	0.00590426	up	N-Glycan biosynthesis		72	Zm00001d037182	12-oxo-phytodienoic acid reductase3	-1.65113	0.00710438	down	alpha-Linolenic acid metabolism
73	Zm00001d001185	------	5.00477	0.00605965	up	------		73	Zm00001d023016	------	-5.58446	0.00757263	down	------
74	Zm00001d048522	Protein Kinase interacting protein isoform 1%3B Protein Kinase interacting protein isoform 2	1.06549	0.0062451	up	------		74	Zm00001d024465	V-type proton ATPase subunit D	-1.74377	0.00798606	down	Oxidative phosphorylation;Phagosome
75	Zm00001d019325	RNA-binding (RRM/RBD/RNP motifs) family protein	1.98404	0.0063358	up	------		75	Zm00001d016269	uncharacterized protein [Source:UniProtKB/TrEMBL;Acc:B6SP60]	-1.22017	0.00799404	down	------
76	Zm00001d035285	Heat shock protein 90-6 mitochondrial	1.00708	0.00638338	up	Plant-pathogen interaction;Protein processing in endoplasmic reticulum		76	Zm00001d005679	TIM-barrel signal transduction protein isoform 2	-1.26163	0.00800388	down	------
77	Zm00001d002412	Probable xyloglucan endotransglucosylase/hydrolase protein 21	3.4227	0.00662807	up	------		77	Zm00001d038687	Beta-arabinofuranosyltransferase RAY1	-1.13569	0.00805672	down	------
78	Zm00001d014517	------	1.48369	0.00698129	up	------		78	Zm00001d015175	Phosphatidylinositol/phosphatidylcholine transfer protein SFH10	-1.36575	0.00826923	down	------
79	Zm00001d036720	Cytochrome b561 DM13 and DOMON domain-containing protein	1.22094	0.00907443	up	------		79	ENSRNA049478841	5.8S ribosomal RNA	-1.96044	0.00860005	down	------
80	Zm00001d020985	Calcium-transporting ATPase 9 plasma membrane-type	1.99732	0.00970897	up	------		80	Zm00001d051540	ATP-dependent DNA helicase [Source:UniProtKB/TrEMBL;Acc:A0A1D6Q7N5]	-2.98786	0.00864263	down	------
81	Zm00001d009336	HEAT repeat-containing protein	4.27268	0.0102077	up	------		81	Zm00001d004066	Serine/arginine-rich splicing factor RSZ22	-1.37613	0.00887889	down	Spliceosome
82	Zm00001d010212	Beta-galactosidase	1.79202	0.0103196	up	------		82	Zm00001d004164	------	-2.97479	0.00979932	down	------
83	Zm00001d034027	Ethylene-responsive protein	1.26862	0.0105054	up	------		83	Zm00001d024324	Putative AP2/EREBP transcription factor superfamily protein	-1.61085	0.0098041	down	------
84	Zm00001d019132	------	3.69058	0.0113249	up	------		84	ZeamMp010	orf396	-2.63066	0.0100388	down	------
85	Zm00001d022550	ABSCISIC ACID-INSENSITIVE 5-like protein 2	2.0554	0.0114264	up	Plant hormone signal transduction		85	Zm00001d035056	GDSL esterase/lipase	-4.31126	0.0105359	down	------
86	Zm00001d024930	------	5.01963	0.0117616	up	------		86	Zm00001d044460	alpha/beta-Hydrolases superfamily protein	-2.53874	0.0108906	down	Glycerophospholipid metabolism
87	Zm00001d046737	RING/U-box superfamily protein	3.41567	0.01221	up	------		87	Zm00001d045916	------	-1.36681	0.0111122	down	------
88	Zm00001d013554	------	1.46143	0.0122244	up	------		88	Zm00001d053040	Zinc finger CCCH domain-containing protein 20	-3.41457	0.0113082	down	------
89	Zm00001d047724	------	1.0427	0.0126671	up	------		89	Zm00001d036255	------	-3.84883	0.0121817	down	------
90	Zm00001d035561	Expressed protein; Mannose-specific jacalin-related lectin; protein	4.78256	0.0126946	up	------		90	Zm00001d045338	HXXXD-type acyl-transferase family protein	-1.13991	0.0121979	down	------
91	Zm00001d000414	Disease resistance protein RPM1	1.21007	0.0133798	up	------		91	Zm00001d046439	ATP-dependent DNA helicase [Source:UniProtKB/TrEMBL;Acc:A0A1D6P2N5]	-4.9263	0.0124593	down	------
92	ENSRNA049478218	Eukaryotic small subunit ribosomal RNA	3.56441	0.0139023	up	------		92	Zm00001d048444	Protein SULFUR DEFICIENCY-INDUCED 1	-1.48211	0.0128059	down	------
93	Zm00001d005770	phospholipase D8	3.29287	0.0142985	up	Ether lipid metabolism;Glycerophospholipid metabolism;Endocytosis		93	Zm00001d042097	Actin-interacting protein 1-2	-4.29068	0.0130513	down	------
94	Zm00001d040333	Serpin-Z1	2.59587	0.0144057	up	------		94	Zm00001d026956	------	-5.36667	0.0134678	down	------
95	Zm00001d047165	------	3.40062	0.0155991	up	------		95	ENSRNA049478622	5.8S ribosomal RNA	-2.35614	0.0137559	down	------
96	Zm00001d007195	Alpha-L-arabinofuranosidase 1	1.09147	0.015908	up	Amino sugar and nucleotide sugar metabolism		96	ENSRNA049478247	Eukaryotic small subunit ribosomal RNA	-1.76766	0.0137757	down	------
97	Zm00001d031070	DNA polymerase eta	4.70517	0.0166113	up	------		97	Zm00001d021998	Scarecrow-like protein 32	-4.2523	0.014096	down	------
98	Zm00001d046582	------	2.57156	0.0170452	up	------		98	Zm00001d025646	18S pre-ribosomal assembly protein gar2-related	-1.48132	0.0145094	down	------
99	Zm00001d035999	BAG family molecular chaperone regulator 1	2.74749	0.0182513	up	------		99	Zm00001d023393	Disease resistance protein RPM1	-4.81768	0.0151342	down	------
100	Zm00001d006915	Non-specific lipid transfer protein-like 1	2.91877	0.0183138	up	------		100	Zm00001d014790	Chaperone protein dnaJ 11	-1.18335	0.0153992	down	------
101	Zm00001d002411	Diphosphomevalonate decarboxylase MVD2	3.3133	0.018328	up	Terpenoid backbone biosynthesis		101	Zm00001d039749	receptor like protein 7	-1.13987	0.0155146	down	------
102	Zm00001d040152	basic helix-loop-helix (bHLH) DNA-binding superfamily protein	1.73049	0.0186525	up	------		102	Zm00001d020627	Subtilisin-like protease SBT1.8	-2.12911	0.0155829	down	------
103	Zm00001d020353	Cyclin-D1-1	2.4282	0.021652	up	------		103	Zm00001d007299	Probable non-specific lipid-transfer protein 2	-1.16962	0.0166335	down	------
104	Zm00001d023776	------	1.56225	0.02166	up	------		104	Zm00001d034314	Transcription initiation factor TFIID subunit 7	-2.6129	0.0168018	down	Basal transcription factors
105	Zm00001d039148	Late embryogenesis abundant (LEA) hydroxyproline-rich glycoprotein family	1.937	0.0216812	up	------		105	Zm00001d018931	Leucine-rich repeat extensin-like protein 6	-1.46764	0.0169229	down	------
106	zma-MIR167e	------	1.49145	0.0220008	up	------		106	Zm00001d029668	RHOMBOID-like protein 3	-1.2446	0.0171554	down	------
107	Zm00001d013493	lipoxygenase5	1.55923	0.0221303	up	Linoleic acid metabolism		107	Zm00001d001945	Auxin response factor 4	-1.48823	0.0172347	down	Plant hormone signal transduction
108	Zm00001d052139	Nitrate reductase	3.29101	0.0221357	up	Nitrogen metabolism		108	Zm00001d006943	Pentatricopeptide repeat-containing protein chloroplastic/mitochondrial	-2.87203	0.0182315	down	------
109	Zm00001d044319	TSL-kinase interacting protein 1	4.71234	0.0225439	up	------		109	Zm00001d048208	Ethylene-responsive transcription factor ERF055	-1.76411	0.0195746	down	------
110	Zm00001d026002	Putative RING zinc finger domain superfamily protein	2.68756	0.023376	up	------		110	Zm00001d045123	TRF-like 5	-1.00289	0.0196423	down	------
111	Zm00001d019861	------	1.15796	0.0244163	up	------		111	Zm00001d035660	Regulator of Vps4 activity in the MVB pathway protein	-1.07683	0.0198988	down	Endocytosis
112	Zm00001d031654	Regulator of nonsense transcripts 1 homolog	3.6913	0.0244535	up	RNA transport;mRNA surveillance pathway		112	Zm00001d019461	DNAJ heat shock N-terminal domain-containing protein	-1.85294	0.0203404	down	------
113	Zm00001d052103	Pectin lyase-like superfamily protein	1.54654	0.0248496	up	------		113	Zm00001d044449	P-loop containing nucleoside triphosphate hydrolases superfamily protein	-5.33577	0.0209946	down	------
114	Zm00001d039177	Polygalacturonase inhibitor 1	1.98463	0.0253944	up	------		114	Zm00001d015957	Acyl-CoA-binding domain-containing protein 3	-4.68776	0.021514	down	------
115	Zm00001d018765	------	5.72127	0.0254944	up	------		115	Zm00001d032501	Endonuclease 1	-2.39693	0.0215292	down	------
116	Zm00001d014103	AT5G26920 (E=2e-022) CBP60G | CBP60G (CAM-BINDING PROTEIN 60-LIKE.G); calmodulin binding	4.57529	0.0255924	up	------		116	Zm00001d038619	------	-5.85158	0.0215419	down	------
117	Zm00001d044230	DUF538 family protein	4.57529	0.0255924	up	------		117	ENSRNA049478633	5.8S ribosomal RNA	-2.13351	0.0216271	down	------
118	Zm00001d025358	TRAF-like superfamily protein	1.90531	0.0268834	up	Ubiquinone and other terpenoid-quinone biosynthesis		118	Zm00001d048839	------	-3.65417	0.0218212	down	------
119	Zm00001d049176	OSJNBa0043A12.20 protein	2.68798	0.027068	up	------		119	Zm00001d031944	Late embryogenesis abundant (LEA) hydroxyproline-rich glycoprotein family	-2.19224	0.0220675	down	------
120	Zm00001d037976	FAM91A1-like protein	5.67549	0.0275591	up	------		120	Zm00001d033447	Globulin-1 S allele	-4.23422	0.0223273	down	------
121	Zm00001d022265	H/ACA ribonucleoprotein complex subunit 4	2.07071	0.0281886	up	Ribosome biogenesis in eukaryotes		121	Zm00001d008792	------	-2.70654	0.0230921	down	------
122	Zm00001d047035	RPM1 interacting protein 13	1.26856	0.0285919	up	------		122	Zm00001d004432	Retrotransposon-like protein	-4.73927	0.0233516	down	------
123	Zm00001d018982	Pentatricopeptide repeat-containing protein mitochondrial	4.47859	0.0289779	up	------		123	Zm00001d045763	O-fucosyltransferase family protein	-1.11019	0.0236134	down	------
124	Zm00001d017629	------	1.16823	0.0292232	up	------		124	Zm00001d043477	cellulose synthase 11	-1.76785	0.0239162	down	------
125	Zm00001d051072	NADPH--cytochrome P450 reductase 2	1.19468	0.0298338	up	------		125	Zm00001d033961	Peptide chain release factor PrfB1 chloroplastic	-2.31684	0.0240357	down	------
126	Zm00001d002160	Wound-responsive family protein	3.8597	0.0321735	up	------		126	Zm00001d038987	Auxin-responsive protein [Source:UniProtKB/TrEMBL;Acc:A0A1D6MCG3]	-5.08217	0.0247322	down	------
127	Zm00001d024522	Putative HLH DNA-binding domain superfamily protein	1.38103	0.0331106	up	------		127	Zm00001d018830	BURP domain protein RD22	-1.77226	0.0257671	down	------
128	Zm00001d022076	------	5.06039	0.0333322	up	------		128	Zm00001d013956	tonoplast intrinsic protein3	-4.73856	0.0259077	down	------
129	Zm00001d049259	Long chain base biosynthesis protein 2a	4.43627	0.0339699	up	Sphingolipid metabolism		129	Zm00001d008211	------	-5.74456	0.025951	down	------
130	Zm00001d026193	Putative WEB family protein chloroplastic	1.29671	0.0346824	up	------		130	Zm00001d044874	23.6 kDa heat shock protein mitochondrial	-1.40775	0.0262798	down	Protein processing in endoplasmic reticulum
131	Zm00001d036744	Mediator of RNA polymerase II transcription subunit 36a	4.8651	0.0354077	up	Ribosome biogenesis in eukaryotes		131	Zm00001d048495	Putative subtilase family protein	-1.75646	0.0263745	down	------
132	Zm00001d016545	Carbohydrate-binding X8 domain superfamily protein	1.52211	0.0356709	up	------		132	Zm00001d038371	Putative laccase family protein	-4.56457	0.0267321	down	------
133	Zm00001d014527	------	2.07918	0.0358349	up	------		133	ZeamMp008	rps4	-2.7406	0.026898	down	Ribosome
134	Zm00001d033152	Cytochrome P450 CYP71W7	1.69358	0.036704	up	------		134	Zm00001d027899	ZIM motif family protein	-2.86898	0.0273122	down	Plant hormone signal transduction
135	Zm00001d023900	Small nuclear ribonucleoprotein family protein	2.49048	0.0368111	up	Spliceosome		135	Zm00001d031191	glycine-rich protein	-1.13587	0.0274406	down	------
136	Zm00001d051548	Protein NRT1/ PTR FAMILY 8.3	3.96543	0.0378618	up	------		136	Zm00001d007963	------	-4.42071	0.0274778	down	------
137	Zm00001d014682	SAUR-like auxin-responsive protein family	1.71977	0.0380773	up	Plant hormone signal transduction		137	Zm00001d020527	Sucrose synthase 3	-4.58761	0.0276965	down	Starch and sucrose metabolism
138	Zm00001d045433	SWI/SNF complex component SNF12 homolog	1.52384	0.038441	up	------		138	Zm00001d019725	Uclacyanin-3	-1.76787	0.0281593	down	------
139	Zm00001d023036	------	3.26461	0.0390765	up	------		139	Zm00001d048730	Cellulase (glycosyl hydrolase family 5) protein	-2.40381	0.0284557	down	------
140	Zm00001d018356	------	2.20649	0.0393242	up	------		140	Zm00001d001838	B3 domain-containing transcription factor LEC2	-1.31581	0.0284589	down	------
141	Zm00001d025314	AP-4 complex subunit epsilon	4.38627	0.0394434	up	------		141	ENSRNA049457201	Eukaryotic large subunit ribosomal RNA	-1.61516	0.028549	down	------
142	Zm00001d011455	CASP-like protein 16	2.32972	0.0394716	up	------		142	Zm00001d008823	ATP-dependent DNA helicase [Source:UniProtKB/TrEMBL;Acc:A0A1D6FFR6]	-5.01331	0.0288067	down	------
143	Zm00001d025284	Nuclear pore complex protein NUP96	3.18463	0.0394763	up	RNA transport		143	Zm00001d034427	Systemin receptor SR160	-1.10643	0.0298115	down	------
144	Zm00001d045235	------	4.33717	0.0394885	up	------		144	Zm00001d033193	Serine-threonine protein kinase plant-type	-2.9824	0.0301501	down	------
145	Zm00001d021085	ALBINO3-like protein 1 chloroplastic	1.0414	0.0399713	up	------		145	Zm00001d027791	------	-4.54384	0.0302966	down	------
146	Zm00001d031426	Serine/threonine-protein kinase UCNL	1.72025	0.0404779	up	------		146	Zm00001d020307	Protein STRICTOSIDINE SYNTHASE-LIKE 11	-1.2242	0.0306273	down	------
147	Zm00001d040479	Type III polyketide synthase B	4.36386	0.0408997	up	------		147	Zm00001d007995	------	-4.53478	0.030769	down	------
148	Zm00001d034253	Pentatricopeptide repeat-containing protein	1.12979	0.0411546	up	------		148	Zm00001d036761	Ubiquitin system component Cue protein	-1.63654	0.0307741	down	------
149	Zm00001d025327	UPF0496 protein	1.65882	0.042081	up	------		149	Zm00001d030498	------	-4.7175	0.0311553	down	------
150	Zm00001d026638	Calcium-binding EF hand family protein	3.73953	0.0423276	up	------		150	Zm00001d047673	DUF4378 domain protein	-2.13444	0.031346	down	------
151	Zm00001d010044	Triose phosphate/phosphate translocator TPT chloroplastic	1.15886	0.0423865	up	------		151	ENSRNA049460169	U1 spliceosomal RNA	-4.59711	0.0314539	down	N-Glycan biosynthesis
152	Zm00001d045384	Superoxide dismutase [Fe] 3 chloroplastic	1.25818	0.0423907	up	Peroxisome		152	Zm00001d048647	Putative MYB DNA-binding domain superfamily protein	-1.07773	0.0318218	down	------
153	Zm00001d028454	L-type lectin-domain containing receptor kinase V.9	2.36576	0.0426728	up	------		153	Zm00001d001068	------	-2.59608	0.0322046	down	------
154	Zm00001d030347	Alcohol dehydrogenase-like 3	1.05006	0.0430456	up	Glycolysis / Gluconeogenesis;Tyrosine metabolism;Fatty acid degradation		154	Zm00001d019726	Uclacyanin-3	-2.61137	0.0324323	down	------
155	Zm00001d006501	F-box protein	1.73413	0.043442	up	------		155	Zm00001d042680	Protein NRT1/ PTR FAMILY 5.10	-3.3996	0.032456	down	------
156	Zm00001d020536	Eukaryotic aspartyl protease family protein	1.80851	0.0448033	up	------		156	Zm00001d027901	ZIM motif family protein	-1.12302	0.0329184	down	Plant hormone signal transduction
157	Zm00001d027580	Mitochondrial outer membrane protein porin 4	7.82986	0.0451603	up	------		157	Zm00001d001791	Glucan endo-1%2C3-beta-glucosidase	-4.00747	0.0332513	down	------
158	Zm00001d002399	Plant intracellular Ras-group-related LRR protein 7	2.75399	0.0452035	up	------		158	Zm00001d032601	ABC transporter G family member 11	-3.43706	0.0336389	down	------
159	Zm00001d013473	------	4.32944	0.0452066	up	------		159	Zm00001d022576	SNF2 domain-containing protein CLASSY 1	-3.86221	0.0336787	down	Homologous recombination
160	Zm00001d032984	Alanine aminotransferase 2 mitochondrial	1.67463	0.0461349	up	Arginine biosynthesis;Alanine, aspartate and glutamate metabolism;Carbon fixation in photosynthetic organisms		160	Zm00001d038883	Mitogen-activated protein kinase kinase kinase YODA	-3.69436	0.0337292	down	MAPK signaling pathway - plant
161	Zm00001d011988	Vacuolar protein sorting-associated protein 41 homolog	2.21067	0.0464323	up	------		161	Zm00001d031709	------	-4.93091	0.0340086	down	Mismatch repair;Homologous recombination;Nucleotide excision repair;DNA replication
162	Zm00001d020362	Catalytic/ hydrolase	1.8858	0.046908	up	------		162	Zm00001d009244	Putative MATE efflux family protein	-2.70492	0.0342206	down	------
163	Zm00001d052124	Putative DUF231 domain containing family protein	1.78749	0.0474178	up	------		163	Zm00001d030345	------	-3.31992	0.0345243	down	------
164	Zm00001d000999	------	2.99543	0.0486149	up	------		164	Zm00001d045473	------	-2.23846	0.0345777	down	------
165	Zm00001d048928	Di-glucose binding with Kinesin motor domain-like protein	1.55932	0.0487157	up	------		165	Zm00001d037298	UDP-glycosyltransferase 84A1	-5.13902	0.0353354	down	------
166	Zm00001d038921	isopentenyl transferase8	1.19761	0.0492211	up	Zeatin biosynthesis		166	Zm00001d015722	------	-1.39323	0.0358077	down	------
167	Zm00001d013553	------	3.21429	0.0494086	up	------		167	Zm00001d001918	------	-2.38663	0.0365645	down	------
168	Zm00001d019222	------	1.11309	0.0495317	up	------		168	Zm00001d007771	------	-3.49049	0.0369065	down	------
169	Zm00001d010046	Xylose isomerase	5.30645	0.049705	up	Pentose and glucuronate interconversions;Fructose and mannose metabolism		169	Zm00001d038364	------	-1.28609	0.0370941	down	------
								170	Zm00001d003990	Purple acid phosphatase 3	-1.35653	0.0380651	down	Riboflavin metabolism
								171	Zm00001d004499	------	-4.8682	0.0382195	down	Glycosylphosphatidylinositol (GPI)-anchor biosynthesis
								172	Zm00001d011785	Transcription factor LUX	-3.40584	0.0383391	down	------
								173	Zm00001d037339	------	-4.25211	0.0396375	down	------
								174	Zm00001d052415	Calmodulin protein	-1.3223	0.0396957	down	MAPK signaling pathway - plant;Plant-pathogen interaction;Phosphatidylinositol signaling system
								175	ZemaCp003	matK	-1.28048	0.0399145	down	------
								176	Zm00001d018106	Protein EXORDIUM	-3.22488	0.0399533	down	------
								177	Zm00001d017999	NAD(P)-binding Rossmann-fold superfamily protein	-2.48226	0.0402138	down	Amino sugar and nucleotide sugar metabolism
								178	Zm00001d041202	------	-1.82967	0.0404636	down	------
								179	Zm00001d026071	Peptidyl-prolyl cis-trans isomerase CYP23	-1.64209	0.0405875	down	------
								180	Zm00001d036610	OSJNBa0058K23.8 protein; protein	-3.77014	0.0406077	down	------
								181	Zm00001d011420	Putative cytochrome P450 superfamily protein	-5.46396	0.0412344	down	------
								182	ZemaCr113	ZemaCr11316S ribosomal RNA	-2.91553	0.0430159	down	------
								183	Zm00001d002681	Calmodulin-binding transcription activator 2	-4.47964	0.043788	down	------
								184	Zm00001d020703	G-type lectin S-receptor-like serine/threonine-protein kinase	-1.8972	0.0448722	down	------
								185	Zm00001d018686	------	-1.3785	0.0450994	down	------
								186	Zm00001d009398	Methylesterase 3	-1.08742	0.0455452	down	Indole alkaloid biosynthesis
								187	Zm00001d043318	Protein LURP-one-related 5	-2.25212	0.0460313	down	------
								188	Zm00001d036704	Histidine kinase 5	-1.23249	0.0470019	down	------
								189	Zm00001d020250	------	-3.86205	0.0470929	down	------
								190	Zm00001d043830	DUF4228 domain protein	-1.41671	0.0484932	down	------
								191	Zm00001d033857	EPIDERMAL PATTERNING FACTOR-like protein 2	-1.42222	0.0485075	down	------
								192	Zm00001d013308	MUTL protein homolog 3	-2.3873	0.0486484	down	Mismatch repair
								193	Zm00001d019957	4-coumarate--CoA ligase-like 9	-2.57705	0.0491794	down	------
								194	Zm00001d001317	------	-4.31481	0.0492093	down	------
								195	Zm00001d041300	------	-4.92996	0.0492545	down	------
								196	Zm00001d032643	------	-1.07795	0.0494373	down	------
								197	Zm00001d015852	lipoxygenase11	-1.2137	0.0496779	down	Linoleic acid metabolism;alpha-Linolenic acid metabolism
								198	Zm00001d001573	------	-2.50062	0.0498018	down	------
								199	Zm00001d007712	P-loop nucleoside triphosphate hydrolases superfamily protein with CH (Calponin Homology) domain	-3.29137	0.0498334	down	------

## Sheet: Sheet 3 -Region III
Supplementary Table 2 - The DEGs identified specific to Regions I-IV of Figure 1B-C
No.	Gene ID1	Description2	Log2FC3	p Value4	Expr.5	KEGG Pathway6		No.	Gene ID1	Description2	Log2FC3	p Value4	Expr.5	KEGG Pathway6
1	Zm00001d017932	Agamous-like MADS-box protein AGL16	1.20156	1.83442e-12	up	------		1	Zm00001d004342	Natterin-4	-1.50604	1.60315e-08	down	------
2	Zm00001d020402	Probable cinnamyl alcohol dehydrogenase 6	1.0582	2.47795e-06	up	Phenylpropanoid biosynthesis		2	Zm00001d044017	Probable plastid-lipid-associated protein 14 chloroplastic	-1.03799	2.11893e-05	down	------
3	Zm00001d044153	cytochrome P450 10	1.13641	3.49121e-06	up	------		3	Zm00001d004348	Natterin-4	-1.13088	7.64287e-05	down	------
4	zma-MIR160b	------	1.05647	5.0162e-06	up	------		4	Zm00001d053007	------	-1.24932	7.83124e-05	down	------
5	Zm00001d011207	------	4.54736	8.71846e-06	up	------		5	Zm00001d037060	DNAJ heat shock N-terminal domain-containing protein	-1.05271	0.00022321	down	------
6	Zm00001d017019	ATFP4	1.12246	1.26231e-05	up	------		6	Zm00001d006035	------	-3.6551	0.000293843	down	------
7	Zm00001d005996	Photosystem I reaction center subunit V	1.07124	1.73174e-05	up	Photosynthesis		7	Zm00001d007549	Beta-carotene isomerase D27 chloroplastic	-1.42711	0.00114805	down	Carotenoid biosynthesis
8	Zm00001d026055	Putative DUF604-domain containing/glycosyltransferase-related family protein	1.12446	1.80632e-05	up	------		8	Zm00001d052139	Nitrate reductase	-4.29034	0.00199443	down	Nitrogen metabolism
9	Zm00001d006511	Glucose-6-phosphate/phosphate translocator 2 chloroplastic	1.0967	2.52693e-05	up	------		9	Zm00001d031203	alpha/beta-Hydrolases superfamily protein	-1.1056	0.00212887	down	------
10	Zm00001d029839	Protein NEN2	1.27041	7.6338e-05	up	------		10	Zm00001d048635	Disease resistance protein RPM1	-1.08685	0.00216234	down	------
11	Zm00001d009707	Protein ABIL1	1.00817	0.000108543	up	------		11	Zm00001d043286	Phosphoglycerate mutase-like family protein	-2.32849	0.00265774	down	Phosphatidylinositol signaling system
12	Zm00001d023673	sugars will eventually be exported transporter13b	1.06541	0.000111062	up	------		12	Zm00001d036026	------	-5.25374	0.00368306	down	------
13	Zm00001d021995	LOB domain-containing protein 38	1.22897	0.000118578	up	------		13	Zm00001d048416	FAD/NAD(P)-binding oxidoreductase family protein	-1.1637	0.0039352	down	------
14	Zm00001d031833	Mitochondrial 2-oxoglutarate/malate carrier protein	1.26774	0.000125086	up	------		14	Zm00001d045231	Developmental protein SEPALLATA 2	-1.99192	0.00412725	down	------
15	Zm00001d023301	Probable galacturonosyltransferase 7	1.00488	0.000206909	up	Amino sugar and nucleotide sugar metabolism		15	Zm00001d012266	------	-5.66935	0.00428858	down	------
16	Zm00001d027881	------	1.67691	0.00026704	up	------		16	Zm00001d020340	cytochrome P450 family 81 subfamily D polypeptide 8	-2.49564	0.00615018	down	------
17	Zm00001d053988	Ocs element-binding factor 1%3B Putative bZIP transcription factor superfamily protein	1.17068	0.000319183	up	------		17	Zm00001d044124	polypeptide	-2.0553	0.0062301	down	------
18	Zm00001d022449	Potassium transporter 2	1.00868	0.000388138	up	------		18	Zm00001d046813	Chaperone protein dnaJ 8 chloroplastic	-2.23828	0.00691307	down	------
19	Zm00001d038297	Zinc finger protein WIP6	1.10635	0.000405429	up	------		19	Zm00001d032330	Pyrophosphate-energized vacuolar membrane proton pump 1	-4.86186	0.0109598	down	Oxidative phosphorylation
20	Zm00001d018871	C2 calcium/lipid-binding plant phosphoribosyltransferase family protein	1.23675	0.000493354	up	------		20	Zm00001d027165	------	-1.0774	0.0125358	down	------
21	Zm00001d044529	Protein NRT1/ PTR FAMILY 6.2	1.29871	0.000524507	up	------		21	Zm00001d000002	dull endosperm1	-3.77612	0.0136338	down	------
22	Zm00001d019674	------	1.30912	0.000553618	up	------		22	Zm00001d027166	------	-1.22798	0.0145285	down	------
23	Zm00001d033079	GDSL esterase/lipase	1.31724	0.000636121	up	------		23	Zm00001d002351	terpene synthase1	-2.20028	0.0146464	down	Terpenoid backbone biosynthesis;Sesquiterpenoid and triterpenoid biosynthesis
24	Zm00001d036900	Cellulose synthase A catalytic subunit 7	1.08994	0.000673876	up	------		24	Zm00001d013708	Probable prefoldin subunit 4	-3.3293	0.0156564	down	------
25	Zm00001d049485	Nuclear transcription factor Y subunit B-3	1.8685	0.00076408	up	------		25	Zm00001d026530	SAUR-like auxin-responsive protein family	-1.18664	0.015946	down	Plant hormone signal transduction
26	Zm00001d016182	Peroxidase 52	1.14127	0.000797978	up	Phenylpropanoid biosynthesis		26	Zm00001d053324	40S ribosomal protein S6-1	-1.10511	0.0168853	down	Ribosome
27	Zm00001d048625	O-methyltransferase ZRP4	1.96902	0.000838399	up	Stilbenoid, diarylheptanoid and gingerol biosynthesis		27	Zm00001d013493	lipoxygenase5	-1.50295	0.0169853	down	Linoleic acid metabolism
28	Zm00001d053091	Adagio protein 3	1.02471	0.000839202	up	Circadian rhythm - plant		28	Zm00001d044819	Myosin-9	-1.36021	0.0180993	down	------
29	Zm00001d053897	Ubiquitin-conjugating enzyme E2 29	1.10624	0.000870885	up	------		29	Zm00001d047170	hAT dimerisation domain-containing protein / transposase-related	-2.25211	0.0184451	down	------
30	Zm00001d048202	Putative bifunctional inhibitor/LTP/seed storage protein family	1.24425	0.000982368	up	------		30	Zm00001d009796	prefoldin 6	-2.10267	0.0207089	down	------
31	Zm00001d026625	Fiber protein Fb34	1.10667	0.00100997	up	------		31	Zm00001d003474	Heterogeneous nuclear ribonucleoprotein U-like protein 1	-3.33095	0.0211315	down	------
32	Zm00001d021946	------	1.20417	0.00105705	up	------		32	Zm00001d017614	Agamous-like MADS-box protein AGL6	-1.189	0.0217275	down	------
33	Zm00001d033496	nicotianamine synthase 3	1.06064	0.00109059	up	------		33	Zm00001d048588	------	-1.09547	0.0224637	down	------
34	Zm00001d031801	Probable carboxylesterase 2	1.22469	0.00111581	up	------		34	Zm00001d011287	------	-4.73387	0.0241322	down	------
35	Zm00001d038192	glutathione transferase41	1.0077	0.00127355	up	Glutathione metabolism		35	Zm00001d001628	------	-1.57237	0.0248275	down	------
36	Zm00001d031892	Calcium-dependent lipid-binding (CaLB domain) family protein	1.57574	0.00141582	up	------		36	ENSRNA049478301	5.8S ribosomal RNA	-3.28517	0.0250244	down	------
37	Zm00001d035360	Retrovirus-related Pol polyprotein LINE-1	4.24339	0.00150211	up	------		37	Zm00001d020500	------	-1.18889	0.0260794	down	------
38	Zm00001d021016	Cytochrome b561 and DOMON domain-containing protein	1.2666	0.00160308	up	------		38	Zm00001d004798	------	-5.77406	0.0265353	down	------
39	Zm00001d031556	AIR12	1.49186	0.00161421	up	------		39	Zm00001d000414	Disease resistance protein RPM1	-1.26156	0.0282881	down	------
40	Zm00001d021938	Putative polyol transporter 1	1.28717	0.00161481	up	------		40	Zm00001d037988	embryo specific protein1	-1.45787	0.0285863	down	------
41	Zm00001d038164	methyl binding domain	1.27728	0.00164484	up	------		41	Zm00001d024664	Tyrosine decarboxylase 1	-1.72983	0.0290374	down	Tyrosine metabolism;Isoquinoline alkaloid biosynthesis
42	Zm00001d004095	basic helix-loop-helix (bHLH) DNA-binding superfamily protein	1.05101	0.00167333	up	------		42	Zm00001d047752	Putative LOB domain-containing family protein	-3.12195	0.0305303	down	------
43	Zm00001d000067	Serine--tRNA ligase cytoplasmic	4.72758	0.00210669	up	Aminoacyl-tRNA biosynthesis		43	Zm00001d028454	L-type lectin-domain containing receptor kinase V.9	-2.28453	0.0322569	down	------
44	Zm00001d042742	BTB/POZ domain-containing protein	1.21276	0.00226188	up	------		44	Zm00001d053579	cytokinin oxidase8b	-4.54461	0.0327176	down	Zeatin biosynthesis
45	Zm00001d025774	Peroxidase superfamily protein	1.55065	0.00228743	up	Phenylpropanoid biosynthesis		45	Zm00001d025598	DExH-box ATP-dependent RNA helicase DExH18 mitochondrial	-3.86014	0.0332611	down	------
46	Zm00001d024528	Choline-phosphate cytidylyltransferase B	1.44616	0.00230186	up	Phosphonate and phosphinate metabolism;Glycerophospholipid metabolism		46	Zm00001d034027	Ethylene-responsive protein	-1.18268	0.0336982	down	------
47	Zm00001d004753	Dirigent protein 11	1.1656	0.00230907	up	------		47	Zm00001d007718	benzoxazinone synthesis13	-2.52399	0.0338692	down	Benzoxazinoid biosynthesis
48	Zm00001d004389	Probable flavin-containing monooxygenase 1	2.57477	0.00242835	up	------		48	Zm00001d047519	basic leucine-zipper 52	-1.04375	0.0340669	down	------
49	Zm00001d023253	L-type lectin-domain containing receptor kinase IX.1	1.21198	0.00248234	up	------		49	Zm00001d050082	Pectinesterase	-1.31623	0.0348793	down	Pentose and glucuronate interconversions
50	Zm00001d008285	PQ-loop repeat family protein / transmembrane family protein	1.19607	0.00253119	up	------		50	Zm00001d045882	F-box family protein	-1.324	0.0389861	down	------
51	Zm00001d022022	Zinc finger protein 7	2.19963	0.00265544	up	------		51	Zm00001d047538	Endo-1%2C4-beta-glucanase	-3.80857	0.039936	down	------
52	Zm00001d007491	Disease resistance protein RPS2	1.00963	0.00275897	up	------		52	Zm00001d012013	------	-1.0979	0.0417005	down	------
53	Zm00001d023675	------	1.04181	0.0036731	up	------		53	Zm00001d049176	OSJNBa0043A12.20 protein	-2.74976	0.0463228	down	------
54	Zm00001d009702	P-loop containing nucleoside triphosphate hydrolases superfamily protein	1.00356	0.00380064	up	------		54	Zm00001d036063	------	-2.01291	0.0464633	down	------
55	Zm00001d029747	Peroxidase 64	1.18792	0.00406961	up	Phenylpropanoid biosynthesis		55	Zm00001d001313	------	-2.47807	0.0481197	down	------
56	Zm00001d047124	Proline oxidase	1.07129	0.00440345	up	Arginine and proline metabolism		56	Zm00001d002845	(+)-neomenthol dehydrogenase	-1.05209	0.0484014	down	Monoterpenoid biosynthesis
57	ENSRNA049478247	Eukaryotic small subunit ribosomal RNA	2.49763	0.00449574	up	------		57	Zm00001d041921	Calcineurin B-like protein 7	-1.04995	0.0486562	down	------
58	Zm00001d015852	lipoxygenase11	2.15164	0.00459805	up	Linoleic acid metabolism;alpha-Linolenic acid metabolism		58	Zm00001d033231	Expansin-B4	-1.69592	0.0487061	down	------
59	Zm00001d040373	------	5.49641	0.00495191	up	------		59	Zm00001d003567	26S proteasome non-ATPase regulatory subunit 11 homolog	-1.03151	0.0489155	down	Proteasome
60	Zm00001d002441	P-loop containing nucleoside triphosphate hydrolases superfamily protein	1.07587	0.00534336	up	------		60	Zm00001d009649	Protein CHUP1 chloroplastic	-1.35586	0.049224	down	------
61	Zm00001d047445	------	1.10556	0.00537854	up	MAPK signaling pathway - plant;Plant hormone signal transduction		61	Zm00001d027184	------	-1.28945	0.0499931	down	------
62	Zm00001d017485	tonoplast intrinsic protein2	1.07544	0.00573948	up	------
63	Zm00001d020577	------	2.30217	0.00590001	up	------
64	Zm00001d033778	Cytochrome b561	1.47423	0.00599902	up	------
65	Zm00001d037205	Protein EXORDIUM	1.47078	0.00629063	up	------
66	Zm00001d019957	4-coumarate--CoA ligase-like 9	4.61442	0.00635375	up	------
67	Zm00001d000291	Transcription factor bHLH69	1.55545	0.00651667	up	------
68	Zm00001d013489	splicing factor Prp18 family protein	1.26035	0.00658616	up	Spliceosome
69	Zm00001d029216	Retrovirus-related Pol polyprotein LINE-1	5.06115	0.00692283	up	------
70	Zm00001d033857	EPIDERMAL PATTERNING FACTOR-like protein 2	1.83008	0.00721918	up	------
71	Zm00001d010661	VQ motif family protein [Source:UniProtKB/TrEMBL;Acc:B6TDS5]	1.57119	0.00792212	up	------
72	Zm00001d000156	Vesicle-fusing ATPase	2.60903	0.00860619	up	------
73	Zm00001d032744	Protein NRT1/ PTR FAMILY 5.2	1.06235	0.00877251	up	------
74	Zm00001d027901	ZIM motif family protein	1.63925	0.00889525	up	Plant hormone signal transduction
75	Zm00001d024382	Xyloglucan endotransglucosylase/hydrolase protein 2	1.07458	0.00900998	up	------
76	Zm00001d044841	Glutaredoxin family protein	1.86543	0.0090617	up	------
77	Zm00001d047211	Putative metacaspase family protein	1.00204	0.00918125	up	------
78	Zm00001d038514	Protein LURP-one-related 8	1.00447	0.00924746	up	------
79	Zm00001d022036	Cysteine proteinases superfamily protein	1.32006	0.0097858	up	Phagosome
80	Zm00001d011503	Sphinganine C4-monooxygenase 1	3.05845	0.0101812	up	Sphingolipid metabolism
81	Zm00001d030588	------	2.74619	0.0105241	up	------
82	Zm00001d038911	Non-specific lipid-transfer protein 2	1.92767	0.0105255	up	------
83	Zm00001d005003	Calmodulin	1.29393	0.0113731	up	MAPK signaling pathway - plant;Phosphatidylinositol signaling system;Plant-pathogen interaction
84	Zm00001d001068	------	3.20496	0.0118275	up	------
85	Zm00001d012290	hemerythrin HHE cation-binding domain protein	1.07028	0.0119198	up	------
86	Zm00001d014625	Cell Division Protein AAA ATPase family	3.62114	0.0122817	up	------
87	Zm00001d038675	SEC14 cytosolic factor family protein / phosphoglyceride transfer family protein	1.05692	0.0123153	up	------
88	Zm00001d052234	------	1.34103	0.0124083	up	------
89	Zm00001d048518	HVA22-like protein i	4.28163	0.0124806	up	------
90	Zm00001d014066	------	1.17524	0.0130753	up	------
91	Zm00001d043050	RING-H2 finger protein ATL74	1.15131	0.0131658	up	------
92	Zm00001d052371	Protein LURP-one-related 8	1.12603	0.0137093	up	------
93	Zm00001d016502	------	1.28266	0.0140283	up	------
94	Zm00001d029594	allene oxide cyclase1	1.8175	0.0140732	up	alpha-Linolenic acid metabolism
95	Zm00001d005439	Disulfide oxidoreductase/ monooxygenase/ oxidoreductase	1.06705	0.0141981	up	Tryptophan metabolism
96	Zm00001d047547	fringe-related protein	1.02584	0.0144014	up	------
97	Zm00001d018195	WAT1-related protein	1.03986	0.0146723	up	------
98	Zm00001d009705	S-type anion channel SLAH3	2.26578	0.0153722	up	------
99	ENSRNA049479006	Eukaryotic small subunit ribosomal RNA	1.78911	0.0161649	up	------
100	Zm00001d032601	ABC transporter G family member 11	4.08818	0.0164278	up	------
101	Zm00001d050988	Ubiquitin-like superfamily protein	1.31327	0.0166783	up	------
102	Zm00001d036209	GroES-like zinc-binding alcohol dehydrogenase family protein	4.61608	0.0169357	up	------
103	Zm00001d050024	Formin-like protein 18	1.43229	0.0170483	up	------
104	Zm00001d018244	------	1.34041	0.0171283	up	------
105	Zm00001d031451	SBP-domain protein 5	2.19967	0.0175767	up	------
106	Zm00001d040219	------	4.04077	0.0175835	up	------
107	Zm00001d035777	------	3.77697	0.0181126	up	------
108	Zm00001d042926	Osmotin-like protein	1.21285	0.0184873	up	------
109	Zm00001d041842	Amino acid permease 2	2.72334	0.0187029	up	------
110	Zm00001d046439	ATP-dependent DNA helicase [Source:UniProtKB/TrEMBL;Acc:A0A1D6P2N5]	7.21342	0.0188801	up	------
111	Zm00001d016748	Protein MKS1	1.73729	0.0190331	up	MAPK signaling pathway - plant
112	Zm00001d017699	Probable xyloglucan endotransglucosylase/hydrolase protein 30	1.10546	0.019399	up	------
113	Zm00001d002629	Putative cytochrome P450 superfamily protein	5.17514	0.019775	up	------
114	Zm00001d051953	DNA polymerase eta	4.66312	0.0205886	up	------
115	Zm00001d036940	UDP-galactose/UDP-glucose transporter 3	1.42123	0.0207748	up	------
116	Zm00001d039584	Probable WRKY transcription factor 13	2.94111	0.0208529	up	------
117	Zm00001d050017	Remorin family protein	1.31362	0.021114	up	------
118	Zm00001d037334	Odorant 1 protein%3B Putative MYB DNA-binding domain superfamily protein	1.17026	0.0212697	up	------
119	Zm00001d032578	Dof zinc finger protein DOF1.6	1.15251	0.0213707	up	------
120	Zm00001d009971	Protein SHI RELATED SEQUENCE 6	2.25321	0.0215041	up	------
121	Zm00001d027499	Acyl-activating enzyme 11	1.24262	0.0215932	up	------
122	Zm00001d031944	Late embryogenesis abundant (LEA) hydroxyproline-rich glycoprotein family	1.92386	0.0217391	up	------
123	Zm00001d046706	Dihydroflavonol-4-reductase	5.09795	0.0219574	up	------
124	Zm00001d044734	U-box domain-containing protein 21	1.31338	0.0224417	up	------
125	Zm00001d018931	Leucine-rich repeat extensin-like protein 6	1.50443	0.0228062	up	------
126	Zm00001d004882	Transcription repressor OFP13	4.17109	0.0232545	up	------
127	Zm00001d029656	Actin-depolymerizing factor	4.26355	0.0233432	up	------
128	Zm00001d020383	Aquaporin PIP1-6	1.06811	0.0234601	up	------
129	Zm00001d007360	ARM repeat superfamily protein	3.01654	0.0236199	up	------
130	Zm00001d021746	Octicosapeptide/Phox/Bem1p family protein	1.81856	0.0236639	up	------
131	Zm00001d019776	------	2.1361	0.0250245	up	------
132	Zm00001d021481	P-loop containing nucleoside triphosphate hydrolases superfamily protein	1.34416	0.0252975	up	------
133	Zm00001d020307	Protein STRICTOSIDINE SYNTHASE-LIKE 11	1.29859	0.0253034	up	------
134	Zm00001d048495	Putative subtilase family protein	1.82695	0.0253413	up	------
135	Zm00001d052538	------	2.65244	0.0255741	up	------
136	Zm00001d010184	------	1.86521	0.0257342	up	------
137	Zm00001d049573	cytochrome P450 family 87 subfamily A polypeptide 6	4.64448	0.025792	up	------
138	Zm00001d027295	beta tubulin1	1.6285	0.0260993	up	Phagosome
139	Zm00001d037914	------	1.89877	0.0267353	up	------
140	Zm00001d024505	------	1.02425	0.0277563	up	Starch and sucrose metabolism
141	Zm00001d005773	Zinc finger protein 346	4.02641	0.0282238	up	------
142	Zm00001d020495	WRKY62-superfamily of TFs having WRKY and zinc finger domains	3.08628	0.0284284	up	------
143	Zm00001d019049	Major facilitator superfamily protein	1.04944	0.0287059	up	------
144	Zm00001d051615	Putative lectin-domain receptor-like protein kinase family protein	1.24189	0.0292673	up	------
145	Zm00001d046485	Putative leucine-rich repeat receptor protein kinase family protein	4.00845	0.0292724	up	------
146	Zm00001d007620	Patatin-like protein 2	5.01099	0.0293622	up	------
147	Zm00001d038519	------	5.67883	0.0304415	up	------
148	Zm00001d044449	P-loop containing nucleoside triphosphate hydrolases superfamily protein	5.11212	0.0307427	up	------
149	Zm00001d021093	------	1.11716	0.0310633	up	------
150	Zm00001d039324	Ethylene-responsive transcription factor CRF4	3.2614	0.0312653	up	------
151	Zm00001d001469	------	4.48833	0.031724	up	------
152	Zm00001d031800	------	1.28395	0.0328006	up	------
153	Zm00001d038619	------	5.62815	0.0329859	up	------
154	Zm00001d031053	Patatin-like protein 6	1.12255	0.0330299	up	------
155	Zm00001d010728	PLASMODESMATA CALLOSE-BINDING PROTEIN 2	1.06661	0.0331139	up	------
156	Zm00001d046416	Putative cytochrome P450 superfamily protein	2.1133	0.0331856	up	------
157	Zm00001d026161	Probable BOI-related E3 ubiquitin-protein ligase 2	1.94568	0.033666	up	------
158	Zm00001d047548	17.0 kDa class II heat shock protein	1.78207	0.0352342	up	Protein processing in endoplasmic reticulum
159	ZeamMp088	orf1159	1.95072	0.0361745	up	------
160	Zm00001d052415	Calmodulin protein	1.0635	0.0363064	up	MAPK signaling pathway - plant;Plant-pathogen interaction;Phosphatidylinositol signaling system
161	Zm00001d050465	Wall-associated receptor kinase 3	2.56213	0.0364875	up	Other glycan degradation
162	Zm00001d004560	Long chain base biosynthesis protein 1	2.48205	0.0367031	up	Sphingolipid metabolism
163	Zm00001d051468	RING/U-box superfamily protein	1.95862	0.0367819	up	------
164	Zm00001d000448	------	2.04695	0.0369122	up	------
165	Zm00001d001825	Transducin/WD40 repeat-like superfamily protein	1.64624	0.0380379	up	------
166	Zm00001d041528	------	4.36149	0.0381274	up	------
167	Zm00001d008211	------	5.52114	0.0389287	up	------
168	Zm00001d048366	Expressed protein; protein	1.29577	0.0394853	up	------
169	Zm00001d039669	Cytosolic sulfotransferase 17	1.00811	0.0397594	up	------
170	Zm00001d048710	benzoxazinone synthesis2	4.46963	0.0398679	up	Benzoxazinoid biosynthesis
171	Zm00001d034861	Retrovirus-related Pol polyprotein LINE-1	2.03827	0.0398792	up	------
172	Zm00001d009506	Cytochrome b561 and DOMON domain-containing protein	1.0845	0.0405095	up	------
173	Zm00001d038434	PPR repeat protein	1.24441	0.0408474	up	------
174	Zm00001d008823	ATP-dependent DNA helicase [Source:UniProtKB/TrEMBL;Acc:A0A1D6FFR6]	4.78795	0.0408671	up	------
175	ZeamMp115	rps13	4.51477	0.0409248	up	Ribosome
176	Zm00001d018256	------	1.65004	0.0409259	up	------
177	Zm00001d016740	------	1.20064	0.04133	up	------
178	Zm00001d003666	magnesium transporter7	4.60559	0.0416746	up	------
179	Zm00001d018601	Laccase-7	3.2574	0.0424775	up	------
180	Zm00001d041291	RING-H2 finger protein ATL70	1.24425	0.0429287	up	------
181	Zm00001d035343	OSJNBa0016N04.12 protein	1.31409	0.0440788	up	------
182	Zm00001d013454	------	1.99216	0.0442611	up	------
183	Zm00001d042188	------	1.00167	0.0446495	up	MAPK signaling pathway - plant;Plant hormone signal transduction
184	Zm00001d028307	Probable inactive poly [ADP-ribose] polymerase SRO1	1.14521	0.0453853	up	------
185	Zm00001d017880	Probable amino acid permease 7	1.09454	0.0456299	up	------
186	Zm00001d034247	DNA mismatch repair protein MLH1	1.79569	0.0462711	up	Mismatch repair
187	ENSRNA049478530	Eukaryotic small subunit ribosomal RNA	2.10591	0.0463055	up	------
188	Zm00001d035899	Pectin lyase-like superfamily protein	1.14479	0.0463102	up	------
189	Zm00001d053395	Pectin lyase-like superfamily protein	1.27078	0.0470035	up	------
190	Zm00001d044627	Cation/H(+) antiporter 14	1.11844	0.0472164	up	------
191	Zm00001d044400	------	1.21377	0.0473125	up	------
192	ZeamMp022	orf911	2.54063	0.0475398	up	------
193	Zm00001d026203	Putative MYB DNA-binding domain superfamily protein	3.08602	0.0478692	up	------
194	Zm00001d027852	Homeobox-transcription factor 102	2.78812	0.0480747	up	------
195	Zm00001d048137	Protein SNOWY COTYLEDON 3	1.19409	0.0484362	up	------
196	Zm00001d021693	------	1.8365	0.0485658	up	------
197	Zm00001d050553	OSJNBa0072D21.11 protein; protein	3.25339	0.048829	up	------
198	Zm00001d011785	Transcription factor LUX	3.26153	0.0490595	up	------

## Sheet: Sheet IV - Region IV
No.	Gene ID1	Description2	Log2FC3	p Value4	Expr.5	KEGG Pathway6		No.	Gene ID1	Description2	Log2FC3	p Value4	Expr.5	KEGG Pathway6
1	Zm00001d044526	Ran BP2/NZF zinc finger-like superfamily protein	2.99603	1.09937e-08	up	------		1	Zm00001d031769	Nitrate reductase [NADH] 2	-1.13746	0.00226163	down	Nitrogen metabolism
2	Zm00001d011123	Zinc finger protein	2.67857	2.59935e-08	up	------		2	Zm00001d040094	G-type lectin S-receptor-like serine/threonine-protein kinase SD2-5	-1.16211	0.0233834	down	------
3	Zm00001d011036	Legumin-like protein%3B Putative rmlC-like cupins superfamily protein	1.67879	4.78503e-08	up	------		3	Zm00001d008862	cytokinin oxidase 5	-1.70069	0.0057106	down	Zeatin biosynthesis
4	Zm00001d038651	Jacalin-related lectin 3	1.39907	1.99551e-07	up	------		4	Zm00001d012764	malic enzyme4	-1.86745	0.00128836	down	Pyruvate metabolism;Carbon fixation in photosynthetic organisms
5	Zm00001d038252	potassium channel2	1.30737	2.19341e-07	up	------		5	Zm00001d011847	Putative HLH DNA-binding domain superfamily protein	-1.89413	0.0492658	down	------
6	Zm00001d023299	Zinc finger CCCH domain-containing protein 46	2.10756	1.08373e-06	up	------		6	Zm00001d044171	Probable WRKY transcription factor 14	-2.00828	0.00291705	down	MAPK signaling pathway - plant;Plant-pathogen interaction
7	Zm00001d045393	Ran BP2/NZF zinc finger-like superfamily protein	1.19494	4.26192e-05	up	------		7	Zm00001d001501	------	-2.03029	0.0328344	down	------
8	Zm00001d021732	Cellulose synthase-like protein D3	1.38522	4.30229e-05	up	------		8	Zm00001d017799	Exonuclease family protein	-2.42629	4.7742e-05	down	------
9	Zm00001d017598	Glucose-methanol-choline (GMC) oxidoreductase family protein	1.63487	0.00012214	up	------		9	Zm00001d040248	Laccase-7	-2.43407	0.0253185	down	------
10	Zm00001d038891	Phosphoethanolamine N-methyltransferase 3	1.64638	0.000132102	up	Glycerophospholipid metabolism		10	Zm00001d052532	Major facilitator superfamily protein	-2.52189	0.030849	down	------
11	Zm00001d012128	Putative two-component response regulator family protein	1.08491	0.000354776	up	Plant hormone signal transduction		11	ENSRNA049478674	5.8S ribosomal RNA	-2.70775	0.00485217	down	------
12	Zm00001d043298	P-loop containing nucleoside triphosphate hydrolases superfamily protein	1.93316	0.000424843	up	------		12	Zm00001d011755	Secreted protein	-2.77625	0.0187433	down	------
13	Zm00001d008408	------	1.49484	0.000521232	up	------		13	Zm00001d006753	Indole-3-acetic acid amido synthetase	-3.16971	0.000452228	down	Plant hormone signal transduction
14	Zm00001d010791	Histidine-containing phosphotransfer protein 4	2.09738	0.000703799	up	Plant hormone signal transduction		14	Zm00001d025382	Histone H3.2	-3.17826	0.000298915	down	------
15	Zm00001d053049	ATPase%2C coupled to transmembrane movement of substance%3B ATPase%2C coupled to transmembrane movement of substances	1.18615	0.000744523	up	------		15	Zm00001d033846	------	-3.21138	0.0266121	down	------
16	Zm00001d007445	Adagio protein 3	1.24059	0.000799184	up	Circadian rhythm - plant		16	Zm00001d009267	Peptidyl-prolyl cis-trans isomerase	-3.22825	0.0157037	down	------
17	Zm00001d042225	Heavy metal transport/detoxification superfamily protein	1.25932	0.000981916	up	------		17	Zm00001d034767	Retrovirus-related Pol polyprotein LINE-1	-4.60058	0.0186921	down	------
18	Zm00001d048220	Outer arm dynein light chain 1 protein	2.59283	0.00158463	up	------		18	Zm00001d034454	Guanylate-binding family protein	-6.91767	1.05525e-07	down	------
19	Zm00001d017597	SPX domain-containing membrane protein	1.03977	0.0020248	up	------
20	Zm00001d037828	GDSL esterase/lipase	1.73135	0.00350927	up	Indole alkaloid biosynthesis
21	Zm00001d008700	vanishing tassel2	1.23563	0.00376826	up	Tryptophan metabolism
22	Zm00001d044112	------	1.73095	0.00445879	up	------
23	Zm00001d031732	BAG family molecular chaperone regulator 1	1.10367	0.00451578	up	------
24	Zm00001d038387	plant-specific domain TIGR01589 family protein expressed	1.57464	0.0053878	up	------
25	Zm00001d032917	------	1.54312	0.00549686	up	------
26	Zm00001d033552	ATPase 4 plasma membrane-type	1.53159	0.00566505	up	Oxidative phosphorylation
27	Zm00001d028675	Plant-specific domain TIGR01589 family protein	2.46413	0.00671586	up	------
28	Zm00001d004931	Heavy metal transport/detoxification superfamily protein	1.30501	0.00911624	up	------
29	Zm00001d044376	Membrane protein	1.19916	0.00926949	up	------
30	Zm00001d010969	Tetraspanin-6	1.0805	0.00974241	up	------
31	Zm00001d051194	Arginine decarboxylase	1.19199	0.0116215	up	Arginine and proline metabolism
32	Zm00001d007312	Apyrase 1	3.42462	0.0120319	up	Purine metabolism;Pyrimidine metabolism
33	Zm00001d021971	Triacylglycerol lipase	1.98723	0.0194487	up	------
34	Zm00001d002432	Protein BREVIS RADIX	1.05369	0.0214839	up	------
35	Zm00001d021167	UDP-glycosyltransferase 74B1	4.48607	0.0299313	up	------
36	Zm00001d029777	Protein EXORDIUM-like 5	1.36796	0.030255	up	------
37	Zm00001d018497	P-loop NTPase domain-containing protein LPA1 homolog 1	1.16263	0.0333606	up	------
38	Zm00001d003784	Glucan endo-13-beta-glucosidase 14	1.54517	0.0388375	up	------
39	Zm00001d039487	1-aminocyclopropane-1-carboxylate synthase1	2.54075	0.0424327	up	Cysteine and methionine metabolism
40	Zm00001d028245	receptor-like protein kinase 4	1.7638	0.0446102	up	------
41	Zm00001d052089	------	1.83861	0.0475417	up	------
