# Supplementary material for: Integrated Transcriptomic and Proteomic Analyses of Low-Nitrogen-Stress Tolerance and Function Analysis of ZmGST42 Gene in Maize
Source: Antioxidants (Basel). 2023 Oct 5;12(10):1831. doi: 10.3390/antiox12101831 (PMC10603844; doi:10.3390/antiox12101831)
Supplement: Supplementary file 1 [file antioxidants-12-01831-s001.zip › Supplementary Table 3 - Sheets 1-3.xlsx]

## Sheet: Sheet 1 -Region I
Supplementary Table 3 - The DAPs identified specific to Regions I-IV of Figure 2B-C
No.	Gene ID1	Description2	Log2FC3	p Value4	Expr.5	KEGG Pathway6		No.	Gene ID1	Description2	Log2FC3	p Value4	Expr.5	KEGG Pathway6
1	Zm00001d011461	uncharacterized protein [Source:UniProtKB/TrEMBL;Acc:B6SMQ8]	0.712086	0.04683	up	------		1	Zm00001d003311	Probable 2-oxoglutarate-dependent dioxygenase AOP1	-1.02728	0.0442	down	------
2	Zm00001d024471	------	0.517592	0.02769	up	------		2	Zm00001d022060	NAD(P)-binding Rossmann-fold superfamily protein	-0.496167	0.007031	down	------
3	Zm00001d029012	Leucine-rich repeat protein kinase family protein	0.418792	0.04246	up	------		3	Zm00001d048452	------	-0.389637	0.00054	down	Biosynthesis of amino acids;Carbon metabolism;Glycolysis / Gluconeogenesis;RNA degradation
4	Zm00001d013034	40S ribosomal protein S2-1	0.380758	0.01899	up	Ribosome		4	Zm00001d014292	Inositol-3-phosphate synthase isozyme 1	-0.36963	0.02831	down	Inositol phosphate metabolism
5	Zm00001d016691	Copper transport protein CCH	0.347736	0.04755	up	------		5	Zm00001d028651	Cysteine-rich repeat secretory protein 55	-0.366756	0.02253	down	------
6	Zm00001d014178	Acylamino-acid-releasing enzyme	0.347604	0.02525	up	------		6	Zm00001d044043	GDSL esterase/lipase	-0.357025	0.01039	down	------
7	Zm00001d052242	ATP synthase subunit delta chloroplastic	0.337939	0.04178	up	Photosynthesis;Oxidative phosphorylation		7	Zm00001d050457	Protein DETOXIFICATION 27	-0.347841	0.02463	down	------
8	Zm00001d035854	Alpha-dioxygenase 1	0.332021	0.04141	up	alpha-Linolenic acid metabolism		8	Zm00001d047449	Protein HUA2-LIKE 3	-0.325604	0.02406	down	------
9	Zm00001d005996	Photosystem I reaction center subunit V	0.311444	0.01732	up	Photosynthesis		9	Zm00001d039732	Staphylococcal-like nuclease CAN1	-0.320471	0.004315	down	------
10	ZemaCp051	psbH	0.282771	0.0164	up	Photosynthesis		10	Zm00001d031666	Probable aldo-keto reductase 4	-0.299975	0.01332	down	------
11	Zm00001d016619	Ubiquinol-cytochrome c reductase iron-sulfur subunit	0.278379	0.0149	up	Oxidative phosphorylation		11	Zm00001d046714	NAD(P)-binding Rossmann-fold superfamily protein	-0.288009	0.009915	down	------
12	Zm00001d021360	CDGSH iron-sulfur domain-containing protein NEET	0.275516	0.04202	up	------		12	Zm00001d031213	LigA	-0.287974	0.03315	down	------
13	Zm00001d042308	60S ribosomal protein L13	0.270367	0.01258	up	Ribosome		13	Zm00001d033084	------	-0.278264	0.01003	down	------
14	Zm00001d022557	nicotianamine synthase5	0.268406	0.02878	up	------		14	Zm00001d012228	4%2C5-DOPA dioxygenase extradiol	-0.273755	0.0347	down	------
15	Zm00001d042555	Zinc-binding dehydrogenase family protein	0.267355	0.02106	up	------
16	Zm00001d029194	cytochrome P450 family 81 subfamily D polypeptide 8	0.263337	3.2e-05	up	------

## Sheet: Sheet 2 - Region II
No.	Gene ID1	Description2	Log2FC3	p Value4	Expr.5	KEGG Pathway6		No.	Gene ID1	Description2	Log2FC3	p Value4	Expr.5	KEGG Pathway6
1	Zm00001d035400	------	1.2007	0.02376	up	------		1	Zm00001d029539	PLASMODESMATA CALLOSE-BINDING PROTEIN 2	-0.732847	0.01891	down	------
2	Zm00001d014792	shepherd-like1	0.961172	0.04357	up	Protein processing in endoplasmic reticulum;Plant-pathogen interaction		2	Zm00001d053965	22.0 kDa heat shock protein	-0.543331	0.02999	down	Protein processing in endoplasmic reticulum
3	Zm00001d043650	Tryptophan aminotransferase-related protein 4	0.834438	0.002257	up	------		3	Zm00001d030014	Tobamovirus multiplication protein 2A	-0.52656	0.02399	down	------
4	Zm00001d039301	Vegetative storage protein PNI288	0.685842	0.009324	up	------		4	Zm00001d035456	------	-0.521286	0.001622	down	------
5	Zm00001d007753	Eukaryotic aspartyl protease family protein	0.679827	0.03725	up	------		5	Zm00001d036319	Proteasome subunit alpha type	-0.482227	0.03391	down	Proteasome
6	Zm00001d008538	ERBB-3 BINDING PROTEIN 1	0.619974	0.0445	up	------		6	Zm00001d016705	ATPase inhibitor	-0.450976	0.003146	down	------
7	Zm00001d038522	Putative leucine-rich repeat receptor-like protein kinase family protein	0.574056	0.03226	up	------		7	Zm00001d027524	Basic endochitinase B	-0.441494	0.008256	down	MAPK signaling pathway - plant;Amino sugar and nucleotide sugar metabolism
8	Zm00001d018903	Ribosomal protein L15	0.496787	0.004138	up	Ribosome		8	Zm00001d043565	Ubiquitin domain-containing protein	-0.40958	0.04481	down	------
9	Zm00001d039278	25.3 kDa vesicle transport protein	0.488886	0.02425	up	------		9	Zm00001d020032	Probable carboxylesterase 15	-0.404109	0.02793	down	------
10	Zm00001d030282	Probable alpha-mannosidase	0.470145	0.001944	up	Other glycan degradation		10	Zm00001d019358	B12D protein	-0.403849	0.04021	down	------
11	Zm00001d049055	Serine carboxypeptidase F13S12.6	0.450728	0.008744	up	------		11	Zm00001d043023	Protein RETICULATA-RELATED 6 chloroplastic	-0.368741	0.03123	down	------
12	Zm00001d047207	Copper-transporting ATPase PAA1	0.445887	0.04078	up	------		12	Zm00001d042783	------	-0.362656	0.02209	down	------
13	Zm00001d013795	Peroxisomal membrane 22 kDa (Mpv17/PMP22) family protein	0.425966	0.02348	up	Peroxisome		13	Zm00001d002426	Thylakoid lumenal 29 kDa protein chloroplastic	-0.350626	0.02857	down	------
14	Zm00001d010456	------	0.420826	0.03401	up	------		14	Zm00001d006587	Chlorophyll a-b binding protein CP29.1 chloroplastic	-0.349598	0.04277	down	Photosynthesis - antenna proteins
15	Zm00001d033139	Cytochrome P450 71D7	0.399026	0.01765	up	------		15	Zm00001d013225	TIP41-like family protein	-0.340829	0.009227	down	------
16	Zm00001d045193	Mitochondrial outer membrane import complex protein METAXIN	0.380221	0.01835	up	------		16	Zm00001d026706	ABC transporter G family member 5	-0.338051	0.01992	down	------
17	Zm00001d016665	Mitochondrial import inner membrane translocase subunit Tim17/Tim22/Tim23 family protein	0.36793	0.04638	up	------		17	Zm00001d037492	Pyrophosphate-energized vacuolar membrane proton pump 1	-0.334476	0.03714	down	Oxidative phosphorylation
18	Zm00001d006630	Chalcone isomerase	0.336415	0.007893	up	------		18	Zm00001d038163	pyruvate orthophosphate dikinase1	-0.327817	0.01145	down	Pyruvate metabolism;Carbon metabolism;Carbon fixation in photosynthetic organisms
19	Zm00001d029649	Plant UBX domain-containing protein 10	0.316073	0.0177	up	------		19	Zm00001d016786	PDIL5-3-Zea mays protein disulfide isomerase	-0.325867	0.006439	down	Protein processing in endoplasmic reticulum
20	Zm00001d032760	60S ribosomal protein L21-1	0.298771	0.02512	up	Ribosome		20	Zm00001d023452	TLD-domain containing nucleolar protein	-0.315697	0.01039	down	------
21	Zm00001d013892	Methionine aminopeptidase	0.295456	0.04497	up	------		21	Zm00001d038855	Flap endonuclease 1	-0.314512	0.04417	down	------
22	Zm00001d019587	------	0.286421	0.04817	up	------		22	Zm00001d019703	Na+/H+ antiporter%2C probable CP0838	-0.312365	0.006476	down	------
23	Zm00001d024322	NEDD8-specific protease 1	0.275703	0.03455	up	------		23	Zm00001d026609	------	-0.301816	0.03905	down	------
								24	Zm00001d024242	V-type proton ATPase subunit D	-0.301653	0.02646	down	Phagosome;Oxidative phosphorylation
								25	Zm00001d042664	Patellin-1	-0.299998	0.01093	down	------
								26	Zm00001d036255	------	-0.297374	0.01672	down	------
								27	Zm00001d014659	Macrophage migration inhibitory factor	-0.295462	0.02877	down	Tyrosine metabolism;Phenylalanine metabolism
								28	Zm00001d042453	aldolase1	-0.287722	0.01503	down	Biosynthesis of amino acids;Glycolysis / Gluconeogenesis;Carbon fixation in photosynthetic organisms;Carbon metabolism;Pentose phosphate pathway;Fructose and mannose metabolism
								29	Zm00001d023692	selenium binding	-0.286411	0.04841	down	------
								30	Zm00001d012812	Pentatricopeptide repeat-containing protein	-0.277278	0.02404	down	------
								31	Zm00001d043909	Callose synthase 11	-0.274428	0.04568	down	------

## Sheet: Sheet 3 -Region III
No.	Gene ID1	Description2	Log2FC3	p Value4	Expr.5	KEGG Pathway6		No.	Gene ID1	Description2	Log2FC3	p Value4	Expr.5	KEGG Pathway6
1	Zm00001d046569	Protein kinase superfamily protein with octicosapeptide/Phox/Bem1p domain	0.432681	0.04427	up	------		1	Zm00001d048920	------	-1.99895	0.000598	down	------
2	Zm00001d004466	Protein transport protein Sec24-like	0.430395	0.01566	up	Protein processing in endoplasmic reticulum		2	Zm00001d033455	Protein P21	-0.703562	0.004901	down	------
3	Zm00001d018954	Rhicadhesin receptor	0.36922	0.007773	up	------		3	Zm00001d004089	Pathogenesis-related protein 1	-0.678236	0.01585	down	------
4	Zm00001d025857	60S ribosomal protein L14-1	0.302195	0.003654	up	Ribosome		4	Zm00001d007753	Eukaryotic aspartyl protease family protein	-0.654716	0.03809	down	------
5	Zm00001d002000	lipoxygenase6	0.283604	0.0335	up	Linoleic acid metabolism		5	Zm00001d019399	Putative lipid-transfer protein DIR1	-0.65047	0.03334	down	------
6	Zm00001d033061	Protein DETOXIFICATION 40	0.269106	0.009337	up	------		6	Zm00001d003190	Endochitinase A	-0.646799	0.0245	down	Amino sugar and nucleotide sugar metabolism
								7	Zm00001d040027	pep chromosome:B73_RefGen_v4:3:23377488:23378234:-1 gene:Zm00001d040027 transcript:Zm00001d040027_T001 gene_biotype:protein_coding transcript_biotype:protein_coding description:Bowman-Birk type wound-induced proteinase inhibitor WIP1 [Source:UniProtKB/TrEMBL;Acc:B4FYK1]	-0.630563	0.0208	down	------
								8	Zm00001d038911	Non-specific lipid-transfer protein 2	-0.601945	0.03921	down	------
								9	Zm00001d008991	Pollen-specific protein-like	-0.594575	0.01714	down	------
								10	Zm00001d028474	Beta-galactosidase	-0.536867	0.03899	down	------
								11	Zm00001d042143	glucan endo-13-beta-glucosidase homolog1	-0.496889	0.009393	down	------
								12	Zm00001d002295	Germin-like protein subfamily 1 member 11	-0.46019	0.02431	down	------
								13	Zm00001d020780	glutathione transferase23	-0.450322	0.04756	down	Glutathione metabolism
								14	Zm00001d032608	alpha-galactosidase1	-0.433897	0.008143	down	------
								15	Zm00001d040723	------	-0.37641	0.04163	down	------
								16	Zm00001d009938	alpha/beta-Hydrolases superfamily protein	-0.372485	0.02856	down	------
								17	Zm00001d031802	NADPH HC toxin reductase	-0.34954	0.00581	down	------
								18	Zm00001d031158	pathogenesis related protein5	-0.335804	0.04695	down	------
								19	Zm00001d005065	BcpLH protein	-0.318461	0.02618	down	------
								20	Zm00001d029046	P-loop containing nucleoside triphosphate hydrolases superfamily protein	-0.308395	0.01279	down	Ribosome biogenesis in eukaryotes
								21	Zm00001d021119	Beta-glucosidase 11	-0.302641	0.009487	down	------
								22	Zm00001d029388	Metacaspase-3	-0.292041	0.04198	down	------
								23	Zm00001d022049	Pentatricopeptide repeat-containing protein mitochondrial	-0.302641	0.04033	down	------
								24	Zm00001d031267	Aldolase-type TIM barrel family protein	-0.28335	0.0107	down	------

## Sheet: Sheet 4 -Region IV
No.	Gene ID1	Description2	Log2FC3	p Value4	Expr.5	KEGG Pathway6		No.	Gene ID1	Description2	Log2FC3	p Value4	Expr.5	KEGG Pathway6
1	Zm00001d038929	ATP synthase2 description:ATP synthase2	0.36407	0.004072	up	Oxidative phosphorylation		1	Zm00001d048630	------	-2.12749	0.019	down	------
								2	Zm00001d043166	UDP-glycosyltransferase 87A1	-0.357394	0.03185	down	------
